# Supplementary material for: A colorimetric test for the evaluation of the insecticide content of LLINs used on Bioko Island, Equatorial Guinea
Source: Springer Nature journal article supplement (doi:10.1186/s12936-021-03967-w), 2021-11-10
Supplement: MOESM1 [file 19851902]

**Table S1: Deltamethrin (DM) concentration (mg/m<sup>2</sup>) of 130 LLINs and mortality rate (%) of a subset of 50 LLINs grouped acc**

| Group                   | Sentinel site | House ID       | LLIN information           |                  |              |              | DM concentration (mg/m <sup>2</sup> ) |           |
|-------------------------|---------------|----------------|----------------------------|------------------|--------------|--------------|---------------------------------------|-----------|
|                         |               |                | Age (months) at collection | Manufacture date | Batch number | Net sections | Each section                          | Whole net |
| Group 1 = 0 - 11 months | Sampaka       | M509S28E93P01  | 1                          | Dec-07           | 15277        | i            | 76.34 ± 6.54                          |           |
|                         |               |                |                            |                  |              | ii           | 90.33 ± 3.04                          |           |
|                         |               |                |                            |                  |              | iii          | 82.72 ± 11.13                         |           |
|                         |               |                |                            |                  |              | iv           | 82.30 ± 3.97                          |           |
|                         |               |                |                            |                  |              | v            | 87.86 ± 0.36                          |           |
|                         |               |                |                            |                  |              | Average      |                                       |           |
| Group 1 = 0 - 11 months | Santa Maria   | M335S92E38P01  | 1                          | Dec-07           | 15277        | i            | 82.72 ± 1.63                          |           |
|                         |               |                |                            |                  |              | ii           | 78.81 ± 2.34                          |           |
|                         |               |                |                            |                  |              | iii          | 72.84 ± 5.89                          |           |
|                         |               |                |                            |                  |              | iv           | 83.74 ± 11.45                         |           |
|                         |               |                |                            |                  |              | v            | 82.30 ± 2.34                          |           |
|                         |               |                |                            |                  |              | Average      |                                       |           |
| Group 1 = 0 - 11 months | Central       | M276S69E13P01  | 2                          | Dec-07           | 15277        | i            | 75.31 ± 3.27                          |           |
|                         |               |                |                            |                  |              | ii           | 67.90 ± 1.63                          |           |
|                         |               |                |                            |                  |              | iii          | 77.78 ± 4.94                          |           |
|                         |               |                |                            |                  |              | iv           | 72.63 ± 3.56                          |           |
|                         |               |                |                            |                  |              | v            | 64.20 ± 12.14                         |           |
|                         |               |                |                            |                  |              | Average      |                                       |           |
| Group 1 = 0 - 11 months | Luba          | M2258S76E18P01 | 2                          | Dec-07           | 15277        | i            | 94.86 ± 7.23                          |           |
|                         |               |                |                            |                  |              | ii           | 101.23 ± 0                            |           |
|                         |               |                |                            |                  |              | iii          | 81.07 ± 5.25                          |           |
|                         |               |                |                            |                  |              | iv           | 91.98 ± 3.75                          |           |
|                         |               |                |                            |                  |              | v            | 99.59 ± 2.78                          |           |
|                         |               |                |                            |                  |              | Average      |                                       |           |
| Group 1 = 0 - 11 months | Bakaka Grande | M1292S52E5P01  | 3                          | Illegible        | Illegible    | i            | 6.17 ± 1.23                           |           |
|                         |               |                |                            |                  |              | ii           | 5.35 ± 0.71                           |           |
|                         |               |                |                            |                  |              | iii          | 31.07 ± 2.49                          |           |

|                         |               |                |   |        |        |         |                |         |               |
|-------------------------|---------------|----------------|---|--------|--------|---------|----------------|---------|---------------|
| Group 1 = 0 - 11 months | Dakare Grande | M129292E0101   | 3 | região | região | iv      | 11.52 ± 0.36   | Average | 14.16 ± 9.83  |
|                         |               |                |   |        |        | v       | 16.67 ± 2.69   |         |               |
|                         |               |                |   |        |        | Average |                |         |               |
| Group 1 = 0 - 11 months | Sampaka       | M509S26E56P01  | 4 | Dec-07 | 15307  | i       | 73.05 ± 5.03   | Average | 80.62 ± 15.75 |
|                         |               |                |   |        |        | ii      | 80.25 ± 2.83   |         |               |
|                         |               |                |   |        |        | iii     | 71.19 ± 6.77   |         |               |
|                         |               |                |   |        |        | iv      | 107.41 ± 10.31 |         |               |
|                         |               |                |   |        |        | v       | 71.19 ± 11.08  |         |               |
|                         |               |                |   |        |        | Average |                |         |               |
| Group 1 = 0 - 11 months | Santa Maria   | M394S13E3P01   | 4 | Dec-07 | 15277  | i       | 30.25 ± 2.14   | Average | 30.7 ± 13.21  |
|                         |               |                |   |        |        | ii      | 17.49 ± 0.71   |         |               |
|                         |               |                |   |        |        | iii     | 53.91 ± 4.34   |         |               |
|                         |               |                |   |        |        | iv      | 21.6 ± 1.23    |         |               |
|                         |               |                |   |        |        | v       | 30.25 ± 1.23   |         |               |
|                         |               |                |   |        |        | Average |                |         |               |
| Group 1 = 0 - 11 months | Campo Yaunde  | M355S49E59P01  | 5 | Nov-09 | 19329  | i       | 27.37 ± 2.85   | Average | 49.09 ± 31.04 |
|                         |               |                |   |        |        | ii      | 11.11 ± 2.14   |         |               |
|                         |               |                |   |        |        | iii     | 41.98 ± 1.07   |         |               |
|                         |               |                |   |        |        | iv      | 94.24 ± 1.28   |         |               |
|                         |               |                |   |        |        | v       | 70.78 ± 4.11   |         |               |
|                         |               |                |   |        |        | Average |                |         |               |
| Group 1 = 0 - 11 months | Central       | M276S69E114P01 | 5 | Dec-07 | 15277  | i       | 63.08 ± 2.74   | Average | 53.66 ± 10.84 |
|                         |               |                |   |        |        | ii      | 34.06 ± 0.29   |         |               |
|                         |               |                |   |        |        | iii     | 58.24 ± 3.75   |         |               |
|                         |               |                |   |        |        | iv      | 52.82 ± 1.4    |         |               |
|                         |               |                |   |        |        | v       | 60.08 ± 2.6    |         |               |
|                         |               |                |   |        |        | Average |                |         |               |
| Group 1 = 0 - 11 months | Semu          | M278S91E26p01  | 5 | Dec-07 | 15277  | i       | 68.72 ± 1.98   | Average | 69.05 ± 2.93  |
|                         |               |                |   |        |        | ii      | 69.14 ± 3.44   |         |               |
|                         |               |                |   |        |        | iii     | 72.22 ± 2.23   |         |               |
|                         |               |                |   |        |        | iv      | 69.34 ± 2.78   |         |               |
|                         |               |                |   |        |        | v       | 65.84 ± 0.94   |         |               |
|                         |               |                |   |        |        | Average |                |         |               |

|                         |                        |                |    |        |       |         |               |               |
|-------------------------|------------------------|----------------|----|--------|-------|---------|---------------|---------------|
| Group 1 = 0 - 11 months | Ela Nguema             | M279S37E28P01  | 6  | Jul-07 | 30357 | i       | 80.66 ± 5.83  |               |
|                         |                        |                |    |        |       | ii      | 89.51 ± 2.23  |               |
|                         |                        |                |    |        |       | iii     | 88.68 ± 11.05 |               |
|                         |                        |                |    |        |       | iv      | 79.84 ± 3.77  |               |
|                         |                        |                |    |        |       | v       | 89.09 ± 10.64 |               |
|                         |                        |                |    |        |       | Average |               | 85.56 ± 7.84  |
| Group 1 = 0 - 11 months | Campo Yaunde           | M335S49E59P01  | 7  | Dec-07 | 15307 | i       | 80.86 ± 5.89  |               |
|                         |                        |                |    |        |       | ii      | 85.19 ± 5.49  |               |
|                         |                        |                |    |        |       | iii     | 81.48 ± 4.9   |               |
|                         |                        |                |    |        |       | iv      | 91.15 ± 1.55  |               |
|                         |                        |                |    |        |       | v       | 89.92 ± 1.55  |               |
|                         |                        |                |    |        |       | Average |               | 85.72 ± 5.7   |
| Group 1 = 0 - 11 months | Central                | M335S8E43P01   | 8  | Jan-07 | 10197 | i       | 49.38 ± 5.38  |               |
|                         |                        |                |    |        |       | ii      | 41.15 ± 1.55  |               |
|                         |                        |                |    |        |       | iii     | 62.76 ± 0.94  |               |
|                         |                        |                |    |        |       | iv      | 54.73 ± 0.94  |               |
|                         |                        |                |    |        |       | v       | 50.41 ± 8.99  |               |
|                         |                        |                |    |        |       | Average |               | 51.69 ± 8.36  |
| Group 1 = 0 - 11 months | Central                | M276S68E34P01  | 8  | Dec-07 | 15307 | i       | 36.42 ± 2.69  |               |
|                         |                        |                |    |        |       | ii      | 81.07 ± 5.18  |               |
|                         |                        |                |    |        |       | iii     | 58.23 ± 2.49  |               |
|                         |                        |                |    |        |       | iv      | 68.52 ± 2.69  |               |
|                         |                        |                |    |        |       | v       | 93.42 ± 3.17  |               |
|                         |                        |                |    |        |       | Average |               | 67.53 ± 20.43 |
| Group 1 = 0 - 11 months | Punta Europa - Bia Bia | M210S000E67P01 | 9  | Dec-07 | 15277 | i       | 49.38 ± 3.27  |               |
|                         |                        |                |    |        |       | ii      | 23.87 ± 3.4   |               |
|                         |                        |                |    |        |       | iii     | 75.31 ± 3.7   |               |
|                         |                        |                |    |        |       | iv      | 73.46 ± 12.33 |               |
|                         |                        |                |    |        |       | v       | 71.81 ± 3.4   |               |
|                         |                        |                |    |        |       | Average |               | 58.77 ± 21.21 |
| Group 1 = 0 - 11 months | Batata                 | M2252S66E8P01  | 10 | Dec-07 | 15307 | i       | 4.12 ± 4.34   |               |
|                         |                        |                |    |        |       | ii      | 20.37 ± 2.23  |               |
|                         |                        |                |    |        |       | iii     | 57.2 ± 3.4    |               |

|                          |            |                |    |        |       |         |               |               |
|--------------------------|------------|----------------|----|--------|-------|---------|---------------|---------------|
| Group 1 = 0 - 11 months  | Batete     | M2252S76E14P01 | 10 | Dec-07 | 15277 | iv      | 44.24 ± 2.78  |               |
|                          |            |                |    |        |       | v       | 45.27 ± 2.92  |               |
|                          |            |                |    |        |       | Average |               | 34.24 ± 20.09 |
| Group 1 = 0 - 11 months  | Batete     | M2252S76E14P01 | 10 | Dec-07 | 15277 | i       | 57.61 ± 1.55  |               |
|                          |            |                |    |        |       | ii      | 61.93 ± 6.18  |               |
|                          |            |                |    |        |       | iii     | 74.49 ± 16.22 |               |
|                          |            |                |    |        |       | iv      | 80.86 ± 5.95  |               |
|                          |            |                |    |        |       | v       | 75.72 ± 6.66  |               |
|                          |            |                |    |        |       | Average |               | 70.12 ± 11.76 |
| Group 1 = 0 - 11 months  | Bilelipa   | M2224S66E1P01  | 10 | Dec-07 | 15307 | i       | 75.1 ± 8.95   |               |
|                          |            |                |    |        |       | ii      | 91.15 ± 6.54  |               |
|                          |            |                |    |        |       | iii     | 75.51 ± 3.17  |               |
|                          |            |                |    |        |       | iv      | 87.86 ± 4.47  |               |
|                          |            |                |    |        |       | v       | 83.33 ± 10.16 |               |
|                          |            |                |    |        |       | Average |               | 82.59 ± 9.01  |
| Group 1 = 0 - 11 months  | Ela Nguema | M278S17E50P01  | 10 | Jul-07 | 30357 | i       | 37.65 ± 8.02  |               |
|                          |            |                |    |        |       | ii      | 46.91 ± 1.85  |               |
|                          |            |                |    |        |       | iii     | 70.78 ± 3.92  |               |
|                          |            |                |    |        |       | iv      | 73.87 ± 1.43  |               |
|                          |            |                |    |        |       | v       | 74.28 ± 2.49  |               |
|                          |            |                |    |        |       | Average |               | 60.7 ± 16.31  |
| Group 1 = 0 - 11 months  | Sampaka    | M509S17E10P01  | 10 | Jul-07 | 30357 | i       | 82.92 ± 4.11  |               |
|                          |            |                |    |        |       | ii      | 72.63 ± 12.95 |               |
|                          |            |                |    |        |       | iii     | 73.25 ± 5.39  |               |
|                          |            |                |    |        |       | iv      | 84.57 ± 1.63  |               |
|                          |            |                |    |        |       | v       | 79.63 ± 3.44  |               |
|                          |            |                |    |        |       | Average |               | 78.6 ± 7.63   |
| Group 2 = 12 - 23 months | Central    | M277S52E101P01 | 12 | Nov-08 | 16498 | i       | 24.28 ± 3.72  |               |
|                          |            |                |    |        |       | ii      | 5.14 ± 0.94   |               |
|                          |            |                |    |        |       | iii     | 13.37 ± 2.57  |               |
|                          |            |                |    |        |       | iv      | 32.3 ± 3.04   |               |
|                          |            |                |    |        |       | v       | 26.34 ± 0.94  |               |
|                          |            |                |    |        |       | Average |               | 20.29 ± 10.3  |

|                          |                        |               |    |        |          |         |               |               |  |
|--------------------------|------------------------|---------------|----|--------|----------|---------|---------------|---------------|--|
| Group 2 = 12 - 23 months | Rebola                 | M459S76E6P01  | 12 | Jul-07 | Ilegible | i       | 13.95 ± 3.74  |               |  |
|                          |                        |               |    |        |          | ii      | 17.08 ± 3.04  |               |  |
|                          |                        |               |    |        |          | iii     | 68.72 ± 5.39  |               |  |
|                          |                        |               |    |        |          | iv      | 44.86 ± 0.94  |               |  |
|                          |                        |               |    |        |          | v       | 46.5 ± 3.17   |               |  |
|                          |                        |               |    |        |          | Average |               | 35.37 ± 21.55 |  |
| Group 2 = 12 - 23 months | Santa Maria            | M394S11E25P01 | 12 | Nov-08 | 16498    | i       | 25.51 ± 3.56  |               |  |
|                          |                        |               |    |        |          | ii      | 58.23 ± 2.34  |               |  |
|                          |                        |               |    |        |          | iii     | 66.05 ± 4.32  |               |  |
|                          |                        |               |    |        |          | iv      | 86.83 ± 10.28 |               |  |
|                          |                        |               |    |        |          | v       | 42.39 ± 0.94  |               |  |
|                          |                        |               |    |        |          | Average |               | 55.8 ± 22.04  |  |
| Group 2 = 12 - 23 months | Semu                   | M278S82E29P01 | 12 | Jul-12 | 15297    | i       | 37.86 ± 4.2   |               |  |
|                          |                        |               |    |        |          | ii      | 18.93 ± 2.17  |               |  |
|                          |                        |               |    |        |          | iii     | 65.84 ± 2.85  |               |  |
|                          |                        |               |    |        |          | iv      | 53.29 ± 5.6   |               |  |
|                          |                        |               |    |        |          | v       | 72.02 ± 1.43  |               |  |
|                          |                        |               |    |        |          | Average |               | 49.59 ± 20.18 |  |
| Group 2 = 12 - 23 months | Bakake Grande - Cupapa | M882S47E25P01 | 14 | Dec-07 | 15307    | i       | 59.88 ± 0.62  |               |  |
|                          |                        |               |    |        |          | ii      | 32.72 ± 0.62  |               |  |
|                          |                        |               |    |        |          | iii     | 52.06 ± 1.55  |               |  |
|                          |                        |               |    |        |          | iv      | 76.75 ± 1.43  |               |  |
|                          |                        |               |    |        |          | v       | 76.75 ± 1.28  |               |  |
|                          |                        |               |    |        |          | Average |               | 59.63 ± 17.15 |  |
| Group 2 = 12 - 23 months | Bakake Grande - Cupapa | M882S47E25P01 | 14 | Dec-07 | 15297    | i       | 68.72 ± 4.95  |               |  |
|                          |                        |               |    |        |          | ii      | 75.72 ± 4.95  |               |  |
|                          |                        |               |    |        |          | iii     | 75.72 ± 2.17  |               |  |
|                          |                        |               |    |        |          | iv      | 88.07 ± 4.47  |               |  |
|                          |                        |               |    |        |          | v       | 78.81 ± 3.56  |               |  |
|                          |                        |               |    |        |          | Average |               | 77.41 ± 7.38  |  |
| Group 2 = 12 - 23 months | Campo Yaunde           | M335S39E72P01 | 14 | Dec-07 | 15277    | i       | 51.23 ± 4.82  |               |  |
|                          |                        |               |    |        |          | ii      | 41.15 ± 5.18  |               |  |
|                          |                        |               |    |        |          | iii     | 63.37 ± 2.49  |               |  |

|                          |                     |                |    |        |       |         |              |               |
|--------------------------|---------------------|----------------|----|--------|-------|---------|--------------|---------------|
| Group 2 = 12 - 23 months | Campo Grande        | M33333E72P01   | 17 | Dec-07 | 15277 | iv      | 60.29 ± 1.55 |               |
|                          |                     |                |    |        |       | v       | 58.02 ± 5.89 |               |
|                          |                     |                |    |        |       | Average |              | 54.81 ± 8.97  |
| Group 2 = 12 - 23 months | Central             | M277S51E2P01   | 14 | Dec-07 | 15297 | i       | 18.93 ± 0.71 |               |
|                          |                     |                |    |        |       | ii      | 27.57 ± 8.87 |               |
|                          |                     |                |    |        |       | iii     | 79.63 ± 5.66 |               |
|                          |                     |                |    |        |       | iv      | 64.61 ± 3.4  |               |
|                          |                     |                |    |        |       | v       | 72.63 ± 3.92 |               |
|                          |                     |                |    |        |       | Average |              | 52.67 ± 25.89 |
| Group 2 = 12 - 23 months | Punta Europa - Sera | M447S52E10P01  | 14 | Dec-07 | 15277 | i       | 79.72 ± 3.75 |               |
|                          |                     |                |    |        |       | ii      | 66.24 ± 3.17 |               |
|                          |                     |                |    |        |       | iii     | 79.34 ± 3    |               |
|                          |                     |                |    |        |       | iv      | 77.6 ± 6.37  |               |
|                          |                     |                |    |        |       | v       | 85.16 ± 7.07 |               |
|                          |                     |                |    |        |       | Average |              | 77.61 ± 7.77  |
| Group 2 = 12 - 23 months | Semu - Alcaide      | M278S92E80P01  | 14 | Jan-07 | 10197 | i       | 67.49 ± 6.31 |               |
|                          |                     |                |    |        |       | ii      | 65.02 ± 4.11 |               |
|                          |                     |                |    |        |       | iii     | 54.73 ± 5.25 |               |
|                          |                     |                |    |        |       | iv      | 68.11 ± 1.43 |               |
|                          |                     |                |    |        |       | v       | 76.34 ± 4.34 |               |
|                          |                     |                |    |        |       | Average |              | 66.34 ± 8.16  |
| Group 2 = 12 - 23 months | Bakake Grande       | M1292S43E11P01 | 15 | Jul-07 | 30357 | i       | 68.93 ± 2.34 |               |
|                          |                     |                |    |        |       | ii      | 76.54 ± 3.44 |               |
|                          |                     |                |    |        |       | iii     | 74.28 ± 2.92 |               |
|                          |                     |                |    |        |       | iv      | 78.19 ± 3.97 |               |
|                          |                     |                |    |        |       | v       | 81.69 ± 1.89 |               |
|                          |                     |                |    |        |       | Average |              | 75.93 ± 5.08  |
| Group 2 = 12 - 23 months | Batete              | M2252S76E10P01 | 15 | Jul-07 | 30357 | i       | 0            |               |
|                          |                     |                |    |        |       | ii      | 10.08 ± 1.28 |               |
|                          |                     |                |    |        |       | iii     | 36.42 ± 3.27 |               |
|                          |                     |                |    |        |       | iv      | 23.25 ± 1.28 |               |
|                          |                     |                |    |        |       | v       | 25.72 ± 0.94 |               |
|                          |                     |                |    |        |       | Average |              | 19.09 ± 13.23 |

|                          |             |               |    |        |       |     |              |               |
|--------------------------|-------------|---------------|----|--------|-------|-----|--------------|---------------|
| Group 2 = 12 - 23 months | Santa Maria | M335S53E19P01 | 15 | Dec-07 | 15287 | i   | 0            |               |
|                          |             |               |    |        |       | ii  | 0            |               |
|                          |             |               |    |        |       | iii | 32.51 ± 1.98 |               |
|                          |             |               |    |        |       | iv  | 10.49 ± 2.23 |               |
|                          |             |               |    |        |       | v   | 11.93 ± 0.36 |               |
| Average                  |             |               |    |        |       |     |              | 10.99 ± 12.35 |
| Group 2 = 12 - 23 months | Sampaka     | M509S52E18P01 | 17 | Dec-07 | 15307 | i   | 0            |               |
|                          |             |               |    |        |       | ii  | 29.84 ± 7.47 |               |
|                          |             |               |    |        |       | iii | 61.93 ± 4.2  |               |
|                          |             |               |    |        |       | iv  | 38.07 ± 0.94 |               |
|                          |             |               |    |        |       | v   | 41.56 ± 3.77 |               |
| Average                  |             |               |    |        |       |     |              | 34.28 ± 21.14 |
| Group 2 = 12 - 23 months | Santa Maria | M333S93E53P01 | 17 | Dec-07 | 15277 | i   | 63.17 ± 3.51 |               |
|                          |             |               |    |        |       | ii  | 46.09 ± 2.57 |               |
|                          |             |               |    |        |       | iii | 79.63 ± 1.63 |               |
|                          |             |               |    |        |       | iv  | 66.67 ± 4.32 |               |
|                          |             |               |    |        |       | v   | 71.19 ± 2.34 |               |
| Average                  |             |               |    |        |       |     |              | 65.35 ± 11.77 |
| Group 2 = 12 - 23 months | Ela Nguema  | M219S85E57P01 | 18 | Dec-07 | 15277 | i   | 18.93 ± 4.55 |               |
|                          |             |               |    |        |       | ii  | 70.16 ± 3.51 |               |
|                          |             |               |    |        |       | iii | 45.06 ± 10.2 |               |
|                          |             |               |    |        |       | iv  | 80.25 ± 6.68 |               |
|                          |             |               |    |        |       | v   | 71.6 ± 1.63  |               |
| Average                  |             |               |    |        |       |     |              | 57.2 ± 23.79  |
| Group 2 = 12 - 23 months | Ela Nguema  | M279S11E9P01  | 18 | Jul-07 | 30357 | i   | 13.17 ± 0.94 |               |
|                          |             |               |    |        |       | ii  | 0            |               |
|                          |             |               |    |        |       | iii | 42.8 ± 2.49  |               |
|                          |             |               |    |        |       | iv  | 0            |               |
|                          |             |               |    |        |       | v   | 20.16 ± 4.34 |               |
| Average                  |             |               |    |        |       |     |              | 15.23 ± 16.5  |
| Group 2 = 12 - 23 months | Ela Nguema  | M219S85E72P01 | 18 | Dec-07 | 15277 | i   | 54.32 ± 3.21 |               |
|                          |             |               |    |        |       | ii  | 60.29 ± 1.28 |               |
|                          |             |               |    |        |       | iii | 68.93 ± 7.21 |               |

|                          |                    |                |    |        |       |         |               |               |
|--------------------------|--------------------|----------------|----|--------|-------|---------|---------------|---------------|
| Group 2 = 12 - 23 months | Lia Nguma          | M219S88E72P01  | 18 | Dec-07 | 15277 | iv      | 74.28 ± 6.48  |               |
|                          |                    |                |    |        |       | v       | 73.46 ± 1.63  |               |
|                          |                    |                |    |        |       | Average |               | 66.26 ± 8.95  |
| Group 2 = 12 - 23 months | Punta Europa       | M211S27E5P01   | 18 | Dec-07 | 15307 | i       | 8.92 ± 1.48   |               |
|                          |                    |                |    |        |       | ii      | 34.98 ± 1.89  |               |
|                          |                    |                |    |        |       | iii     | 33.88 ± 0.92  |               |
|                          |                    |                |    |        |       | iv      | 23.86 ± 3.03  |               |
|                          |                    |                |    |        |       | v       | 39.56 ± 2.75  |               |
|                          |                    |                |    |        |       | Average |               | 27.89 ± 11.57 |
| Group 2 = 12 - 23 months | Sampaka            | M509S28E93P01  | 18 | Dec-07 | 15307 | i       | 22.35 ± 19.51 |               |
|                          |                    |                |    |        |       | ii      | 10.49 ± 1.85  |               |
|                          |                    |                |    |        |       | iii     | 24.69 ± 2.69  |               |
|                          |                    |                |    |        |       | iv      | 34.77 ± 3.04  |               |
|                          |                    |                |    |        |       | v       | 12.72 ± 5.27  |               |
|                          |                    |                |    |        |       | Average |               | 20.27 ± 12.82 |
| Group 2 = 12 - 23 months | Semu               | M277S71E88P01  | 18 | Dec-07 | 15277 | i       | 6.38 ± 0.36   |               |
|                          |                    |                |    |        |       | ii      | 8.85 ± 0.94   |               |
|                          |                    |                |    |        |       | iii     | 24.28 ± 3.11  |               |
|                          |                    |                |    |        |       | iv      | 9.67 ± 3.72   |               |
|                          |                    |                |    |        |       | v       | 25.31 ± 1.63  |               |
|                          |                    |                |    |        |       | Average |               | 14.9 ± 8.67   |
| Group 2 = 12 - 23 months | Central            | M276S88E22P01  | 19 | Jan-07 | 10197 | i       | 62.55 ± 2.17  |               |
|                          |                    |                |    |        |       | ii      | 62.96 ± 2.69  |               |
|                          |                    |                |    |        |       | iii     | 40.74 ± 5.05  |               |
|                          |                    |                |    |        |       | iv      | 63.99 ± 4.11  |               |
|                          |                    |                |    |        |       | v       | 64.2 ± 7.71   |               |
|                          |                    |                |    |        |       | Average |               | 58.89 ± 10.24 |
| Group 2 = 12 - 23 months | Basacato del Oeste | M1321S37E10P01 | 20 | Jan-07 | 10197 | i       | 72.02 ± 1.28  |               |
|                          |                    |                |    |        |       | ii      | 66.46 ± 6.18  |               |
|                          |                    |                |    |        |       | iii     | 47.12 ± 3.4   |               |
|                          |                    |                |    |        |       | iv      | 71.19 ± 6.18  |               |
|                          |                    |                |    |        |       | v       | 72.02 ± 0.94  |               |
|                          |                    |                |    |        |       | Average |               | 65.76 ± 10.52 |

|                          |                    |                |    |        |       |         |              |               |
|--------------------------|--------------------|----------------|----|--------|-------|---------|--------------|---------------|
| Group 2 = 12 - 23 months | Basacato del Oeste | M1321S37E10P01 | 20 | Jan-07 | 10197 | i       | 72.02 ± 2.78 |               |
|                          |                    |                |    |        |       | ii      | 73.87 ± 0.94 |               |
|                          |                    |                |    |        |       | iii     | 70.16 ± 5.7  |               |
|                          |                    |                |    |        |       | iv      | 75.31 ± 3.44 |               |
|                          |                    |                |    |        |       | v       | 75.31 ± 2.83 |               |
|                          |                    |                |    |        |       | Average |              | 73.33 ± 3.6   |
| Group 3 = 24 - 35 months | Ela Nguema         | M279S12E45P01  | 24 | Jan-07 | 10197 | i       | 62.14 ± 2.78 |               |
|                          |                    |                |    |        |       | ii      | 57.2 ± 0.94  |               |
|                          |                    |                |    |        |       | iii     | 47.12 ± 3.11 |               |
|                          |                    |                |    |        |       | iv      | 72.22 ± 5.89 |               |
|                          |                    |                |    |        |       | v       | 59.88 ± 6.68 |               |
|                          |                    |                |    |        |       | Average |              | 59.71 ± 9.17  |
| Group 3 = 24 - 35 months | Rebola             | M460S33E9P01   | 24 | Jul-07 | 30357 | i       | 14.61 ± 1.89 |               |
|                          |                    |                |    |        |       | ii      | 15.64 ± 2.49 |               |
|                          |                    |                |    |        |       | iii     | 19.96 ± 4.79 |               |
|                          |                    |                |    |        |       | iv      | 10.86 ± 3.51 |               |
|                          |                    |                |    |        |       | v       | 24.9 ± 4.55  |               |
|                          |                    |                |    |        |       | Average |              | 16.45 ± 6     |
| Group 3 = 24 - 35 months | Rebola             | M460S83E9P01   | 24 | Jul-07 | 30357 | i       | 61.11 ± 9.88 |               |
|                          |                    |                |    |        |       | ii      | 76.34 ± 3.17 |               |
|                          |                    |                |    |        |       | iii     | 71.6 ± 3.75  |               |
|                          |                    |                |    |        |       | iv      | 70.58 ± 3.62 |               |
|                          |                    |                |    |        |       | v       | 82.72 ± 3.21 |               |
|                          |                    |                |    |        |       | Average |              | 72.47 ± 8.66  |
| Group 3 = 24 - 35 months | Riaba              | M2694S63E13P01 | 24 | Apr-06 | 15277 | i       | 58.02 ± 3.21 |               |
|                          |                    |                |    |        |       | ii      | 66.87 ± 7.62 |               |
|                          |                    |                |    |        |       | iii     | 82.92 ± 3.17 |               |
|                          |                    |                |    |        |       | iv      | 56.79 ± 1.85 |               |
|                          |                    |                |    |        |       | v       | 59.26 ± 2.83 |               |
|                          |                    |                |    |        |       | Average |              | 64.77 ± 10.69 |
| Group 3 = 24 - 35 months | Riaba              | M2694S53E4P01  | 24 | Nov-08 | 16498 | i       | 76.54 ± 3.09 |               |
|                          |                    |                |    |        |       | ii      | 95.88 ± 2.85 |               |
|                          |                    |                |    |        |       | iii     | 66.46 ± 2.17 |               |

|                          |              |               |    |        |       |         |               |               |
|--------------------------|--------------|---------------|----|--------|-------|---------|---------------|---------------|
| Group 3 = 24 - 35 months | Naba         | M209T00E41P01 | 24 | Nov-00 | 10750 | iv      | 98.15 ± 6.26  |               |
|                          |              |               |    |        |       | v       | 91.15 ± 6.31  |               |
|                          |              |               |    |        |       | Average |               | 85.64 ± 13.17 |
| Group 3 = 24 - 35 months | Santa Maria  | M394S1E38P01  | 24 | Dec-07 | 15297 | i       | 43.21 ± 0.62  |               |
|                          |              |               |    |        |       | ii      | 28.6 ± 1.78   |               |
|                          |              |               |    |        |       | iii     | 47.74 ± 3.62  |               |
|                          |              |               |    |        |       | iv      | 48.35 ± 0.36  |               |
|                          |              |               |    |        |       | v       | 52.67 ± 2.92  |               |
|                          |              |               |    |        |       | Average |               | 44.12 ± 8.82  |
| Group 3 = 24 - 35 months | Santa Maria  | M394S1E38P01  | 24 | Dec-07 | 15307 | i       | 61.52 ± 1.78  |               |
|                          |              |               |    |        |       | ii      | 53.91 ± 3.51  |               |
|                          |              |               |    |        |       | iii     | 69.96 ± 1.89  |               |
|                          |              |               |    |        |       | iv      | 60.7 ± 1.98   |               |
|                          |              |               |    |        |       | v       | 57.41 ± 2.47  |               |
|                          |              |               |    |        |       | Average |               | 60.7 ± 5.91   |
| Group 3 = 24 - 35 months | Central      | M277S53E1P01  | 25 | Dec-07 | 15287 | i       | 79.42 ± 11.13 |               |
|                          |              |               |    |        |       | ii      | 88.89 ± 6.96  |               |
|                          |              |               |    |        |       | iii     | 51.44 ± 1.98  |               |
|                          |              |               |    |        |       | iv      | 95.06 ± 7.48  |               |
|                          |              |               |    |        |       | v       | 80.45 ± 3.11  |               |
|                          |              |               |    |        |       | Average |               | 79.05 ± 16.55 |
| Group 3 = 24 - 35 months | Sampaka      | M509S28E93P01 | 26 | Dec-07 | 15287 | i       | 39.3 ± 8.91   |               |
|                          |              |               |    |        |       | ii      | 59.05 ± 4.38  |               |
|                          |              |               |    |        |       | iii     | 74.69 ± 4.9   |               |
|                          |              |               |    |        |       | iv      | 82.51 ± 2.49  |               |
|                          |              |               |    |        |       | v       | 86.21 ± 1.28  |               |
|                          |              |               |    |        |       | Average |               | 68.35 ± 18.38 |
| Group 3 = 24 - 35 months | Campo Yaunde | M335S59E32P01 | 27 | Nov-08 | 16498 | i       | 50 ± 1.23     |               |
|                          |              |               |    |        |       | ii      | 70.16 ± 0.71  |               |
|                          |              |               |    |        |       | iii     | 69.75 ± 2.69  |               |
|                          |              |               |    |        |       | iv      | 73.87 ± 4.67  |               |
|                          |              |               |    |        |       | v       | 73.05 ± 4.67  |               |
|                          |              |               |    |        |       | Average |               | 67.37 ± 9.54  |

|                          |              |               |    |        |       |         |               |               |
|--------------------------|--------------|---------------|----|--------|-------|---------|---------------|---------------|
| Group 3 = 24 - 35 months | Campo Yaunde | M335S59E1P01  | 27 | Jan-07 | 10197 | i       | 25.93 ± 5.66  |               |
|                          |              |               |    |        |       | ii      | 14.94 ± 4.22  |               |
|                          |              |               |    |        |       | iii     | 50.21 ± 2.78  |               |
|                          |              |               |    |        |       | iv      | 47.12 ± 1.43  |               |
|                          |              |               |    |        |       | v       | 55.35 ± 3.72  |               |
|                          |              |               |    |        |       | Average |               | 35.91 ± 17.33 |
| Group 3 = 24 - 35 months | Campo Yaunde | M335S28E56P01 | 27 | Jan-08 | 10198 | i       | 16.46 ± 1.28  |               |
|                          |              |               |    |        |       | ii      | 30.45 ± 0.36  |               |
|                          |              |               |    |        |       | iii     | 41.56 ± 3.4   |               |
|                          |              |               |    |        |       | iv      | 37.24 ± 4.67  |               |
|                          |              |               |    |        |       | v       | 25.93 ± 2.47  |               |
|                          |              |               |    |        |       | Average |               | 30.33 ± 9.41  |
| Group 3 = 24 - 35 months | Sacriba      | M502S65E3P01  | 27 | Dec-07 | 15277 | i       | 40.12 ± 6.44  |               |
|                          |              |               |    |        |       | ii      | 29.75 ± 10.21 |               |
|                          |              |               |    |        |       | iii     | 43.42 ± 1.43  |               |
|                          |              |               |    |        |       | iv      | 40.33 ± 2.78  |               |
|                          |              |               |    |        |       | v       | 52.47 ± 10.71 |               |
|                          |              |               |    |        |       | Average |               | 39.87 ± 10.53 |
| Group 3 = 24 - 35 months | Campo Yaunde | M335S68E80P01 | 28 | Dec-07 | 15297 | i       | 41.98 ± 2.69  |               |
|                          |              |               |    |        |       | ii      | 28.19 ± 3.4   |               |
|                          |              |               |    |        |       | iii     | 69.96 ± 2.34  |               |
|                          |              |               |    |        |       | iv      | 63.37 ± 3.4   |               |
|                          |              |               |    |        |       | v       | 61.73 ± 2.23  |               |
|                          |              |               |    |        |       | Average |               | 53.05 ± 16.27 |
| Group 3 = 24 - 35 months | Campo Yaunde | M335S49E62P01 | 28 | Jan-07 | 10197 | i       | 10.08 ± 0.94  |               |
|                          |              |               |    |        |       | ii      | 24.69 ± 3.21  |               |
|                          |              |               |    |        |       | iii     | 62.14 ± 3.62  |               |
|                          |              |               |    |        |       | iv      | 40.53 ± 0.94  |               |
|                          |              |               |    |        |       | v       | 33.95 ± 1.23  |               |
|                          |              |               |    |        |       | Average |               | 34.28 ± 17.99 |
| Group 3 = 24 - 35 months | Central      | M335S8E43P01  | 28 | Nov-08 | 16498 | i       | 52.26 ± 1.43  |               |
|                          |              |               |    |        |       | ii      | 47.94 ± 4.11  |               |
|                          |              |               |    |        |       | iii     | 7.41 ± 3.27   |               |

|                          |             |               |    |          |          |         |              |               |
|--------------------------|-------------|---------------|----|----------|----------|---------|--------------|---------------|
| Group 3 = 24 - 35 months | Central     | M333S7E109P01 | 28 | Nov-07   | 10490    | iv      | 59.67 ± 5.6  |               |
|                          |             |               |    |          |          | v       | 45.68 ± 2.69 |               |
|                          |             |               |    |          |          | Average |              | 42.59 ± 19.12 |
| Group 3 = 24 - 35 months | Ela Nguema  | M278S7E109P01 | 28 | Dec-07   | 15287    | i       | 53.7 ± 4.32  |               |
|                          |             |               |    |          |          | ii      | 67.7 ± 0.36  |               |
|                          |             |               |    |          |          | iii     | 77.57 ± 6.31 |               |
|                          |             |               |    |          |          | iv      | 70.16 ± 0.94 |               |
|                          |             |               |    |          |          | v       | 70.99 ± 2.83 |               |
|                          |             |               |    |          |          | Average |              | 68.02 ± 8.72  |
| Group 3 = 24 - 35 months | Santa Maria | M334S90E62P01 | 28 | Dec-07   | 15297    | i       | 33.95 ± 3.44 |               |
|                          |             |               |    |          |          | ii      | 47.74 ± 1.78 |               |
|                          |             |               |    |          |          | iii     | 65.02 ± 0.71 |               |
|                          |             |               |    |          |          | iv      | 73.05 ± 8.56 |               |
|                          |             |               |    |          |          | v       | 79.63 ± 6.42 |               |
|                          |             |               |    |          |          | Average |              | 59.88 ± 17.91 |
| Group 3 = 24 - 35 months | Semu        | M277S71E01P01 | 28 | Jan-07   | 10197    | i       | 0            |               |
|                          |             |               |    |          |          | ii      | 0            |               |
|                          |             |               |    |          |          | iii     | 19.34 ± 1.43 |               |
|                          |             |               |    |          |          | iv      | 31.69 ± 3.77 |               |
|                          |             |               |    |          |          | v       | 36.01 ± 4.99 |               |
|                          |             |               |    |          |          | Average |              | 17.41 ± 15.95 |
| Group 3 = 24 - 35 months | Sampaka     | M509S7E54P01  | 29 | Jan-07   | 10197    | i       | 8.44 ± 1.28  |               |
|                          |             |               |    |          |          | ii      | 0            |               |
|                          |             |               |    |          |          | iii     | 16.46 ± 4.11 |               |
|                          |             |               |    |          |          | iv      | 9.26 ± 0.62  |               |
|                          |             |               |    |          |          | v       | 15.84 ± 4.95 |               |
|                          |             |               |    |          |          | Average |              | 10 ± 6.67     |
| Group 3 = 24 - 35 months | Sampaka     | M509S7E54P01  | 29 | Ilegible | Ilegible | i       | 18.11 ± 2.34 |               |
|                          |             |               |    |          |          | ii      | 0            |               |
|                          |             |               |    |          |          | iii     | 15.43 ± 2.23 |               |
|                          |             |               |    |          |          | iv      | 15.43 ± 2.69 |               |
|                          |             |               |    |          |          | v       | 33.74 ± 5.74 |               |
|                          |             |               |    |          |          | Average |              | 16.54 ± 11.42 |

|                          |                    |               |    |          |          |     |              |               |
|--------------------------|--------------------|---------------|----|----------|----------|-----|--------------|---------------|
| Group 3 = 24 - 35 months | Sampaka            | M509S28E86P01 | 29 | Jan-07   | 10197    | i   | 20.78 ± 1.43 |               |
|                          |                    |               |    |          |          | ii  | 27.78 ± 4.28 |               |
|                          |                    |               |    |          |          | iii | 31.69 ± 4.99 |               |
|                          |                    |               |    |          |          | iv  | 27.78 ± 0    |               |
|                          |                    |               |    |          |          | v   | 32.92 ± 4.55 |               |
| Average                  |                    |               |    |          |          |     |              | 28.19 ± 5.35  |
| Group 3 = 24 - 35 months | Basacato del Oeste | M1321S27E6P01 | 30 | Jan-07   | 10197    | i   | 20.99 ± 4.28 |               |
|                          |                    |               |    |          |          | ii  | 19.55 ± 0.36 |               |
|                          |                    |               |    |          |          | iii | 19.34 ± 6    |               |
|                          |                    |               |    |          |          | iv  | 26.54 ± 1.28 |               |
|                          |                    |               |    |          |          | v   | 25.1 ± 0.36  |               |
| Average                  |                    |               |    |          |          |     |              | 22.3 ± 4.38   |
| Group 3 = 24 - 35 months | Basacato del Oeste | M1321S27E6P01 | 30 | no tiene | No tiene | i   | 0            |               |
|                          |                    |               |    |          |          | ii  | 0            |               |
|                          |                    |               |    |          |          | iii | 0            |               |
|                          |                    |               |    |          |          | iv  | 0            |               |
|                          |                    |               |    |          |          | v   | 0            |               |
| Average                  |                    |               |    |          |          |     |              | 0             |
| Group 3 = 24 - 35 months | Central            | M276S60E83P02 | 30 | Jan-07   | 10197    | i   | 15.43 ± 8.3  |               |
|                          |                    |               |    |          |          | ii  | 17.28 ± 2.69 |               |
|                          |                    |               |    |          |          | iii | 17.7 ± 0.36  |               |
|                          |                    |               |    |          |          | iv  | 16.26 ± 1.89 |               |
|                          |                    |               |    |          |          | v   | 13.99 ± 3.77 |               |
| Average                  |                    |               |    |          |          |     |              | 16.13 ± 3.92  |
| Group 3 = 24 - 35 months | Santa Maria        | M335S95E35P01 | 30 | Jul-07   | 30357    | i   | 15.23 ± 2.17 |               |
|                          |                    |               |    |          |          | ii  | 16.87 ± 0.36 |               |
|                          |                    |               |    |          |          | iii | 49.79 ± 0.94 |               |
|                          |                    |               |    |          |          | iv  | 32.3 ± 3.4   |               |
|                          |                    |               |    |          |          | v   | 36.01 ± 6.6  |               |
| Average                  |                    |               |    |          |          |     |              | 30.04 ± 13.61 |
| Group 3 = 24 - 35 months | Samu               | M278S91E61P02 | 30 | Jul-07   | 30357    | i   | 0            |               |
|                          |                    |               |    |          |          | ii  | 0            |               |
|                          |                    |               |    |          |          | iii | 20.37 ± 1.63 |               |

|                          |               |               |    |        |       |         |               |               |
|--------------------------|---------------|---------------|----|--------|-------|---------|---------------|---------------|
| Group 3 = 24 - 35 months | Semu          | M278S91E61P02 | 30 | Dec-07 | 15287 | iv      | 7.41 ± 6.53   |               |
|                          |               |               |    |        |       | v       | 13.99 ± 3.51  |               |
|                          |               |               |    |        |       | Average |               | 8.35 ± 8.72   |
| Group 3 = 24 - 35 months | Semu          | M278S91E61P02 | 30 | Dec-07 | 15287 | i       | 0             |               |
|                          |               |               |    |        |       | ii      | 13.37 ± 3.72  |               |
|                          |               |               |    |        |       | iii     | 11.93 ± 0.36  |               |
|                          |               |               |    |        |       | iv      | 11.11 ± 2.47  |               |
|                          |               |               |    |        |       | v       | 14.81 ± 2.83  |               |
|                          |               |               |    |        |       | Average |               | 10.25 ± 5.82  |
| Group 3 = 24 - 35 months | Santa Maria   | M393S30E41P01 | 32 | Mar-09 | 12009 | i       | 11.93 ± 0.71  |               |
|                          |               |               |    |        |       | ii      | 22.43 ± 2.49  |               |
|                          |               |               |    |        |       | iii     | 24.07 ± 2.83  |               |
|                          |               |               |    |        |       | iv      | 24.69 ± 0.62  |               |
|                          |               |               |    |        |       | v       | 19.14 ± 2.83  |               |
|                          |               |               |    |        |       | Average |               | 20.45 ± 5.17  |
| Group 3 = 24 - 35 months | Sampaka       | M450S78E10P01 | 33 | Dec-07 | 15307 | i       | 42.18 ± 2.49  |               |
|                          |               |               |    |        |       | ii      | 52.06 ± 0.94  |               |
|                          |               |               |    |        |       | iii     | 61.32 ± 1.89  |               |
|                          |               |               |    |        |       | iv      | 71.81 ± 2.92  |               |
|                          |               |               |    |        |       | v       | 78.81 ± 6.77  |               |
|                          |               |               |    |        |       | Average |               | 61.23 ± 13.97 |
| Group 3 = 24 - 35 months | Santa Maria   | M335S83E2P01  | 33 | Dec-07 | 15277 | i       | 83.95 ± 2.47  |               |
|                          |               |               |    |        |       | ii      | 78.19 ± 4.02  |               |
|                          |               |               |    |        |       | iii     | 80.04 ± 11.47 |               |
|                          |               |               |    |        |       | iv      | 90.95 ± 7.21  |               |
|                          |               |               |    |        |       | v       | 69.55 ± 5.74  |               |
|                          |               |               |    |        |       | Average |               | 80.53 ± 9.32  |
| Group 4 = 36 - 47 months | Bakake Grande | M1292S52E5P01 | 36 | Jul-07 | 30357 | i       | 43.21 ± 2.83  |               |
|                          |               |               |    |        |       | ii      | 48.77 ± 2.14  |               |
|                          |               |               |    |        |       | iii     | 61.93 ± 5.25  |               |
|                          |               |               |    |        |       | iv      | 44.65 ± 9.1   |               |
|                          |               |               |    |        |       | v       | 72.63 ± 2.78  |               |
|                          |               |               |    |        |       | Average |               | 54.24 ± 12.49 |

|                          |                        |                |    |           |           |         |              |               |  |
|--------------------------|------------------------|----------------|----|-----------|-----------|---------|--------------|---------------|--|
| Group 4 = 36 - 47 months | Bakake Grande          | M1292S63E12P01 | 36 | Nov-08    | 16498     | i       | 55.97 ± 2.57 |               |  |
|                          |                        |                |    |           |           | ii      | 55.56 ± 4.32 |               |  |
|                          |                        |                |    |           |           | iii     | 66.05 ± 2.47 |               |  |
|                          |                        |                |    |           |           | iv      | 56.17 ± 4.28 |               |  |
|                          |                        |                |    |           |           | v       | 76.95 ± 6.31 |               |  |
|                          |                        |                |    |           |           | Average |              | 62.14 ± 9.39  |  |
| Group 4 = 36 - 47 months | Bakake Grande - Bososo | M1292S51E10P01 | 36 | Jul-07    | 30357     | i       | 70.99 ± 3.27 |               |  |
|                          |                        |                |    |           |           | ii      | 74.49 ± 4.67 |               |  |
|                          |                        |                |    |           |           | iii     | 71.4 ± 0.94  |               |  |
|                          |                        |                |    |           |           | iv      | 60.91 ± 4.79 |               |  |
|                          |                        |                |    |           |           | v       | 73.46 ± 1.07 |               |  |
|                          |                        |                |    |           |           | Average |              | 70.25 ± 5.78  |  |
| Group 4 = 36 - 47 months | Bososo                 | M1292S52E5P01  | 36 | Jul-07    | 30357     | i       | 12.55 ± 1.78 |               |  |
|                          |                        |                |    |           |           | ii      | 29.63 ± 3.44 |               |  |
|                          |                        |                |    |           |           | iii     | 34.57 ± 1.85 |               |  |
|                          |                        |                |    |           |           | iv      | 39.71 ± 6.83 |               |  |
|                          |                        |                |    |           |           | v       | 41.98 ± 3.21 |               |  |
|                          |                        |                |    |           |           | Average |              | 31.69 ± 11.33 |  |
| Group 4 = 36 - 47 months | Sampaka                | M450S85E5P01   | 36 | Jan-07    | 10197     | i       | 29.56 ± 2.03 |               |  |
|                          |                        |                |    |           |           | ii      | 26.62 ± 0.93 |               |  |
|                          |                        |                |    |           |           | iii     | 17.54 ± 0.36 |               |  |
|                          |                        |                |    |           |           | iv      | 26.8 ± 1.33  |               |  |
|                          |                        |                |    |           |           | v       | 31.5 ± 1.33  |               |  |
|                          |                        |                |    |           |           | Average |              | 26.4 ± 5.05   |  |
| Group 4 = 36 - 47 months | Sampaka                | M450S85E5P01   | 36 | Jul-07    | 30357     | i       | 61.73 ± 2.69 |               |  |
|                          |                        |                |    |           |           | ii      | 68.52 ± 2.83 |               |  |
|                          |                        |                |    |           |           | iii     | 78.6 ± 2.17  |               |  |
|                          |                        |                |    |           |           | iv      | 66.46 ± 2.34 |               |  |
|                          |                        |                |    |           |           | v       | 72.43 ± 3.17 |               |  |
|                          |                        |                |    |           |           | Average |              | 69.55 ± 6.31  |  |
| Group 4 = 36 - 47 months | Samu                   | M278S82E69P01  | 36 | Illegible | Illegible | i       | 0            |               |  |
|                          |                        |                |    |           |           | ii      | 0            |               |  |
|                          |                        |                |    |           |           | iii     | 28.19 ± 1.28 |               |  |

|                          |              |               |    |          |          |         |              |              |
|--------------------------|--------------|---------------|----|----------|----------|---------|--------------|--------------|
| Group 4 = 36 - 47 months | Semu         | M278S91E4P01  | 36 | Ilegible | Ilegible | iv      | 0            |              |
|                          |              |               |    |          |          | v       | 0            |              |
|                          |              |               |    |          |          | Average |              | 5.64 ± 11.68 |
| Group 4 = 36 - 47 months | Semu         | M278S91E4P01  | 36 | Ilegible | Ilegible | i       | 0            |              |
|                          |              |               |    |          |          | ii      | 0            |              |
|                          |              |               |    |          |          | iii     | 0            |              |
|                          |              |               |    |          |          | iv      | 0            |              |
|                          |              |               |    |          |          | v       | 0            |              |
|                          |              |               |    |          |          | Average |              | 0            |
| Group 4 = 36 - 47 months | Basopu       | M502S39E11P01 | 37 | Nov-06   | 13646    | i       | 3.2 ± 0.79   |              |
|                          |              |               |    |          |          | ii      | 10.36 ± 0.93 |              |
|                          |              |               |    |          |          | iii     | 31.02 ± 0.94 |              |
|                          |              |               |    |          |          | iv      | 8.86 ± 1.36  |              |
|                          |              |               |    |          |          | v       | 18.04 ± 1.17 |              |
|                          |              |               |    |          |          | Average |              | 14.3 ± 9.91  |
| Group 4 = 36 - 47 months | Basopu       | M502S39E11P01 | 37 | Jul-07   | 30357    | i       | 26.64 ± 1.4  |              |
|                          |              |               |    |          |          | ii      | 30.06 ± 1.15 |              |
|                          |              |               |    |          |          | iii     | 52.02 ± 0.87 |              |
|                          |              |               |    |          |          | iv      | 38.16 ± 1.68 |              |
|                          |              |               |    |          |          | v       | 47.14 ± 2.51 |              |
|                          |              |               |    |          |          | Average |              | 38.8 ± 10.04 |
| Group 4 = 36 - 47 months | Santa Maria  | M394S2E12P01  | 37 | Dec-07   | 15277    | i       | 9.26 ± 0.62  |              |
|                          |              |               |    |          |          | ii      | 4.94 ± 4.32  |              |
|                          |              |               |    |          |          | iii     | 39.71 ± 2.78 |              |
|                          |              |               |    |          |          | iv      | 17.9 ± 1.63  |              |
|                          |              |               |    |          |          | v       | 26.54 ± 6.5  |              |
|                          |              |               |    |          |          | Average |              | 19.67 ± 13.3 |
| Group 4 = 36 - 47 months | Campo Yaunde | M335S27E22P01 | 38 | Dec-07   | 15307    | i       | 64.4 ± 1.28  |              |
|                          |              |               |    |          |          | ii      | 54.12 ± 3.97 |              |
|                          |              |               |    |          |          | iii     | 60.49 ± 3.44 |              |
|                          |              |               |    |          |          | iv      | 75.93 ± 2.47 |              |
|                          |              |               |    |          |          | v       | 74.69 ± 1.85 |              |
|                          |              |               |    |          |          | Average |              | 65.93 ± 8.95 |

|                          |                        |                |    |          |          |         |              |              |  |
|--------------------------|------------------------|----------------|----|----------|----------|---------|--------------|--------------|--|
| Group 4 = 36 - 47 months | Ela Nguema             | M278S30E22P01  | 38 | Jan-07   | 10197    | i       | 38.48 ± 6.8  |              |  |
|                          |                        |                |    |          |          | ii      | 46.09 ± 2.49 |              |  |
|                          |                        |                |    |          |          | iii     | 53.5 ± 1.55  |              |  |
|                          |                        |                |    |          |          | iv      | 48.56 ± 2.49 |              |  |
|                          |                        |                |    |          |          | v       | 49.59 ± 3.92 |              |  |
|                          |                        |                |    |          |          | Average |              | 47.24 ± 6.13 |  |
| Group 4 = 36 - 47 months | Semu                   | M336S40E29P01  | 39 | Ilegible | Ilegible | i       | 42.39 ± 9.77 |              |  |
|                          |                        |                |    |          |          | ii      | 44.24 ± 4.47 |              |  |
|                          |                        |                |    |          |          | iii     | 56.79 ± 5.49 |              |  |
|                          |                        |                |    |          |          | iv      | 55.56 ± 8.07 |              |  |
|                          |                        |                |    |          |          | v       | 52.26 ± 3.04 |              |  |
|                          |                        |                |    |          |          | Average |              | 50.25 ± 8.27 |  |
| Group 4 = 36 - 47 months | Central                | M276S69E18P01  | 40 | Jan-07   | 10197    | i       | 0            |              |  |
|                          |                        |                |    |          |          | ii      | 0            |              |  |
|                          |                        |                |    |          |          | iii     | 0            |              |  |
|                          |                        |                |    |          |          | iv      | 0            |              |  |
|                          |                        |                |    |          |          | v       | 0            |              |  |
|                          |                        |                |    |          |          | Average |              | 0            |  |
| Group 4 = 36 - 47 months | Punta Europa           | M211S57E4P01   | 40 | Jul-07   | 30357    | i       | 4.5 ± 0.56   |              |  |
|                          |                        |                |    |          |          | ii      | 0.86 ± 0.1   |              |  |
|                          |                        |                |    |          |          | iii     | 27.48 ± 1.12 |              |  |
|                          |                        |                |    |          |          | iv      | 5.24 ± 1.37  |              |  |
|                          |                        |                |    |          |          | v       | 21.42 ± 0.92 |              |  |
|                          |                        |                |    |          |          | Average |              | 11.9 ± 10.83 |  |
| Group 4 = 36 - 47 months | Bososo - Bakake Grande | M1292S43E617P1 | 41 | Jul-07   | 30357    | i       | 0            |              |  |
|                          |                        |                |    |          |          | ii      | 7.41 ± 2.14  |              |  |
|                          |                        |                |    |          |          | iii     | 13.99 ± 3.77 |              |  |
|                          |                        |                |    |          |          | iv      | 7.82 ± 2.49  |              |  |
|                          |                        |                |    |          |          | v       | 12.76 ± 0.36 |              |  |
|                          |                        |                |    |          |          | Average |              | 8.4 ± 5.46   |  |
| Group 4 = 36 - 47 months | Bososo - Bakake Grande | M1292S43E617P1 | 41 | Jul-07   | Ilegible | i       | 14.2 ± 1.63  |              |  |
|                          |                        |                |    |          |          | ii      | 14.2 ± 0.62  |              |  |
|                          |                        |                |    |          |          | iii     | 26.75 ± 1.98 |              |  |

|                          |                        |                |    |          |          |         |                |                |
|--------------------------|------------------------|----------------|----|----------|----------|---------|----------------|----------------|
| Group 4 = 36 - 47 months | D03030 - Darake Grande | M1292070E17111 | 41 | Jul-07   | Ilegible | iv      | 13.58 ± 2.47   |                |
|                          |                        |                |    |          |          | v       | 16.05 ± 1.63   |                |
|                          |                        |                |    |          |          | Average |                | 16.95 ± 5.36   |
| Group 4 = 36 - 47 months | Campo Yaunde           | M335S68E34P01  | 41 | Ilegible | Ilegible | i       | 0              |                |
|                          |                        |                |    |          |          | ii      | 0              |                |
|                          |                        |                |    |          |          | iii     | 0              |                |
|                          |                        |                |    |          |          | iv      | 0              |                |
|                          |                        |                |    |          |          | v       | 0              |                |
|                          |                        |                |    |          |          | Average |                | 0              |
| Group 4 = 36 - 47 months | Ela Nguema             | M279S37E28P01  | 42 | Ilegible | Ilegible | i       | 64.2 ± 5.35    |                |
|                          |                        |                |    |          |          | ii      | 30.45 ± 2.92   |                |
|                          |                        |                |    |          |          | iii     | 151.23 ± 14.02 |                |
|                          |                        |                |    |          |          | iv      | 154.73 ± 21.91 |                |
|                          |                        |                |    |          |          | v       | 298.97 ± 17.04 |                |
|                          |                        |                |    |          |          | Average |                | 139.92 ± 97.14 |
| Group 4 = 36 - 47 months | Sampaka                | M450S85E5P01   | 42 | Jan-07   | 10197    | i       | 38.68 ± 1.98   |                |
|                          |                        |                |    |          |          | ii      | 40.33 ± 3.51   |                |
|                          |                        |                |    |          |          | iii     | 57 ± 2.57      |                |
|                          |                        |                |    |          |          | iv      | 69.96 ± 1.28   |                |
|                          |                        |                |    |          |          | v       | 54.32 ± 5.05   |                |
|                          |                        |                |    |          |          | Average |                | 52.06 ± 12.25  |
| Group 4 = 36 - 47 months | Santa Maria            | M393S30E18P01  | 42 | Jun-06   | 12280    | i       | 72.72 ± 12.39  |                |
|                          |                        |                |    |          |          | ii      | 59.47 ± 9.04   |                |
|                          |                        |                |    |          |          | iii     | 96.09 ± 4.99   |                |
|                          |                        |                |    |          |          | iv      | 76.13 ± 4.34   |                |
|                          |                        |                |    |          |          | v       | 86.42 ± 12.53  |                |
|                          |                        |                |    |          |          | Average |                | 77.52 ± 14.9   |
| Group 4 = 36 - 47 months | Santa Maria            | M335S93E3P01   | 42 | Ilegible | Ilegible | i       | 0              |                |
|                          |                        |                |    |          |          | ii      | 0              |                |
|                          |                        |                |    |          |          | iii     | 4.12 ± 3.56    |                |
|                          |                        |                |    |          |          | iv      | 0              |                |
|                          |                        |                |    |          |          | v       | 9.47 ± 1.28    |                |
|                          |                        |                |    |          |          | Average |                | 2.72 ± 4.12    |

|                          |              |               |    |          |          |         |               |               |  |
|--------------------------|--------------|---------------|----|----------|----------|---------|---------------|---------------|--|
| Group 4 = 36 - 47 months | Sacriba      | M502S37E28P01 | 43 | Nov-06   | 13646    | i       | 74.28 ± 12.49 |               |  |
|                          |              |               |    |          |          | ii      | 82.51 ± 2.57  |               |  |
|                          |              |               |    |          |          | iii     | 93 ± 4.2      |               |  |
|                          |              |               |    |          |          | iv      | 80.45 ± 2.78  |               |  |
|                          |              |               |    |          |          | v       | 79.42 ± 5.18  |               |  |
|                          |              |               |    |          |          | Average |               | 81.93 ± 8.45  |  |
| Group 4 = 36 - 47 months | Sacriba      | M502S37E28P01 | 43 | Jul-07   | 30357    | i       | 94.86 ± 2.57  |               |  |
|                          |              |               |    |          |          | ii      | 90.95 ± 5.25  |               |  |
|                          |              |               |    |          |          | iii     | 77.16 ± 3.27  |               |  |
|                          |              |               |    |          |          | iv      | 96.09 ± 3.04  |               |  |
|                          |              |               |    |          |          | v       | 88.68 ± 5.93  |               |  |
|                          |              |               |    |          |          | Average |               | 89.55 ± 7.84  |  |
| Group 4 = 36 - 47 months | Sacriba      | M502S37E28P01 | 43 | Dec-07   | 15307    | i       | 43.21 ± 3.27  |               |  |
|                          |              |               |    |          |          | ii      | 78.81 ± 4.34  |               |  |
|                          |              |               |    |          |          | iii     | 89.51 ± 9.32  |               |  |
|                          |              |               |    |          |          | iv      | 61.52 ± 2.78  |               |  |
|                          |              |               |    |          |          | v       | 59.88 ± 3.85  |               |  |
|                          |              |               |    |          |          | Average |               | 66.58 ± 17.22 |  |
| Group 4 = 36 - 47 months | Central      | M277S53E20P01 | 44 | Jan-07   | 10197    | i       | 64.61 ± 2.85  |               |  |
|                          |              |               |    |          |          | ii      | 77.98 ± 3.62  |               |  |
|                          |              |               |    |          |          | iii     | 80.45 ± 7.36  |               |  |
|                          |              |               |    |          |          | iv      | 88.48 ± 5.18  |               |  |
|                          |              |               |    |          |          | v       | 88.27 ± 7.48  |               |  |
|                          |              |               |    |          |          | Average |               | 79.96 ± 10.21 |  |
| Group 4 = 36 - 47 months | Santa Maria  | M394S12E77P01 | 45 | Ilegible | Ilegible | i       | 28.6 ± 4.2    |               |  |
|                          |              |               |    |          |          | ii      | 21.6 ± 3.44   |               |  |
|                          |              |               |    |          |          | iii     | 32.72 ± 5.27  |               |  |
|                          |              |               |    |          |          | iv      | 26.13 ± 0.94  |               |  |
|                          |              |               |    |          |          | v       | 28.19 ± 2.17  |               |  |
|                          |              |               |    |          |          | Average |               | 27.45 ± 4.8   |  |
| Group 5 = 48 - 52 months | Punta Europa | M211S57E4P01  | 48 | Jan-07   | 10197    | i       | 2.8 ± 0.39    |               |  |
|                          |              |               |    |          |          | ii      | 8.4 ± 1.66    |               |  |
|                          |              |               |    |          |          | iii     | 10.38 ± 0.69  |               |  |

|                          |              |                |    |        |          |         |              |               |
|--------------------------|--------------|----------------|----|--------|----------|---------|--------------|---------------|
| Group 5 = 48 - 52 months | Punta Europa | M211S5E4P01    | 48 | Jul-07 | 10197    | iv      | 7.98 ± 1.35  |               |
|                          |              |                |    |        |          | v       | 29.9 ± 1.23  |               |
|                          |              |                |    |        |          | Average |              | 11.89 ± 9.64  |
| Group 5 = 48 - 52 months | Punta Europa | M211S5E4P01    | 48 | Jul-07 | 30357    | i       | 0.44 ± 0.1   |               |
|                          |              |                |    |        |          | ii      | 0.36 ± 0.1   |               |
|                          |              |                |    |        |          | iii     | 1 ± 1.04     |               |
|                          |              |                |    |        |          | iv      | 1.78 ± 0.92  |               |
|                          |              |                |    |        |          | v       | 6.32 ± 0.81  |               |
|                          |              |                |    |        |          | Average |              | 1.98 ± 2.37   |
| Group 5 = 48 - 52 months | Sampaka      | M509S27E59P01  | 48 | Jan-07 | 10197    | i       | 71.19 ± 3.04 |               |
|                          |              |                |    |        |          | ii      | 65.43 ± 4.45 |               |
|                          |              |                |    |        |          | iii     | 48.77 ± 8.75 |               |
|                          |              |                |    |        |          | iv      | 63.17 ± 5.03 |               |
|                          |              |                |    |        |          | v       | 73.05 ± 0.71 |               |
|                          |              |                |    |        |          | Average |              | 64.32 ± 9.88  |
| Group 5 = 48 - 52 months | Sampaka      | M509S26E46P01  | 48 | Jan-07 | 10197    | i       | 28.19 ± 1.78 |               |
|                          |              |                |    |        |          | ii      | 32.1 ± 4.32  |               |
|                          |              |                |    |        |          | iii     | 59.26 ± 1.23 |               |
|                          |              |                |    |        |          | iv      | 61.52 ± 4.79 |               |
|                          |              |                |    |        |          | v       | 59.05 ± 5.74 |               |
|                          |              |                |    |        |          | Average |              | 48.02 ± 15.56 |
| Group 5 = 48 - 52 months | Semu         | M366S17E132P01 | 48 | Dec-07 | 15277    | i       | 59.26 ± 3.31 |               |
|                          |              |                |    |        |          | ii      | 38.58 ± 8.37 |               |
|                          |              |                |    |        |          | iii     | 59.96 ± 4.82 |               |
|                          |              |                |    |        |          | iv      | 58.5 ± 3.28  |               |
|                          |              |                |    |        |          | v       | 55.62 ± 2.38 |               |
|                          |              |                |    |        |          | Average |              | 54.38 ± 9.33  |
| Group 5 = 48 - 52 months | Semu         | M277S71E88P02  | 48 | Nov-08 | llegible | i       | 37.86 ± 1.28 |               |
|                          |              |                |    |        |          | ii      | 35.8 ± 1.85  |               |
|                          |              |                |    |        |          | iii     | 35.19 ± 4.05 |               |
|                          |              |                |    |        |          | iv      | 16.17 ± 6.44 |               |
|                          |              |                |    |        |          | v       | 31.07 ± 3.97 |               |
|                          |              |                |    |        |          | Average |              | 29.45 ± 9.88  |

|                          |                |                |    |          |          |         |               |               |  |  |
|--------------------------|----------------|----------------|----|----------|----------|---------|---------------|---------------|--|--|
| Group 5 = 48 - 52 months | Semu - Alcaide | M337S95E62P01  | 48 | Jul-07   | 30357    | i       | 4.94 ± 0.87   |               |  |  |
|                          |                |                |    |          |          | ii      | 3.86 ± 0.78   |               |  |  |
|                          |                |                |    |          |          | iii     | 55.09 ± 4.43  |               |  |  |
|                          |                |                |    |          |          | iv      | 9.1 ± 0.78    |               |  |  |
|                          |                |                |    |          |          | v       | 42.59 ± 13.96 |               |  |  |
|                          |                |                |    |          |          | Average |               | 23.12 ± 22.77 |  |  |
| Group 5 = 48 - 52 months | Semu - Alcaide | M336S17E132P01 | 48 | Jul-07   | 30357    | i       | 36.63 ± 2.85  |               |  |  |
|                          |                |                |    |          |          | ii      | 3.5 ± 1.89    |               |  |  |
|                          |                |                |    |          |          | iii     | 34.57 ± 1.63  |               |  |  |
|                          |                |                |    |          |          | iv      | 34.16 ± 3.51  |               |  |  |
|                          |                |                |    |          |          | v       | 26.17 ± 10.66 |               |  |  |
|                          |                |                |    |          |          | Average |               | 26.91 ± 13.16 |  |  |
| Group 5 = 48 - 52 months | Semu - Alcaide | M336S17E132P01 | 48 | Jul-07   | 30357    | i       | 20.99 ± 4.66  |               |  |  |
|                          |                |                |    |          |          | ii      | 16.79 ± 12.94 |               |  |  |
|                          |                |                |    |          |          | iii     | 51.23 ± 4.32  |               |  |  |
|                          |                |                |    |          |          | iv      | 44.44 ± 12.33 |               |  |  |
|                          |                |                |    |          |          | v       | 43.95 ± 11.63 |               |  |  |
|                          |                |                |    |          |          | Average |               | 34.41 ± 17.15 |  |  |
| Group 5 = 48 - 52 months | Semu - Alcaide | M336S40E30P01  | 48 | Dec-07   | 15287    | i       | 4.12 ± 0.36   |               |  |  |
|                          |                |                |    |          |          | ii      | 3.29 ± 0.36   |               |  |  |
|                          |                |                |    |          |          | iii     | 58.23 ± 3.56  |               |  |  |
|                          |                |                |    |          |          | iv      | 14.81 ± 3.09  |               |  |  |
|                          |                |                |    |          |          | v       | 34.77 ± 4.34  |               |  |  |
|                          |                |                |    |          |          | Average |               | 23.05 ± 21.81 |  |  |
| Group 5 = 48 - 52 months | Semu - Alcaide | M337S95E62P01  | 48 | Ilegible | Ilegible | i       | 75.51 ± 6.77  |               |  |  |
|                          |                |                |    |          |          | ii      | 67.08 ± 5.87  |               |  |  |
|                          |                |                |    |          |          | iii     | 69.75 ± 7.12  |               |  |  |
|                          |                |                |    |          |          | iv      | 61.11 ± 3.44  |               |  |  |
|                          |                |                |    |          |          | v       | 72.02 ± 3.17  |               |  |  |
|                          |                |                |    |          |          | Average |               | 69.09 ± 6.86  |  |  |
| Group 5 = 48 - 52 months | Semu - Alcaide | M336S10E23P01  | 48 | Dec-07   | 15297    | i       | 6.79 ± 0.62   |               |  |  |
|                          |                |                |    |          |          | ii      | 0             |               |  |  |
|                          |                |                |    |          |          | iii     | 19.14 ± 1.07  |               |  |  |

|                          |                |                |    |          |       |         |              |              |
|--------------------------|----------------|----------------|----|----------|-------|---------|--------------|--------------|
| Group 5 = 48 - 52 months | Semu - Alcaide | M336S29E5P01   | 48 | Dec-07   | 15277 | iv      | 6.58 ± 1.43  |              |
|                          |                |                |    |          |       | v       | 20.99 ± 4.45 |              |
|                          |                |                |    |          |       | Average |              | 10.7 ± 8.53  |
| Group 5 = 48 - 52 months | Semu - Alcaide | M336S29E5P01   | 48 | Dec-07   | 15277 | i       | 43.64 ± 3.06 |              |
|                          |                |                |    |          |       | ii      | 41.86 ± 1.52 |              |
|                          |                |                |    |          |       | iii     | 66.46 ± 2.15 |              |
|                          |                |                |    |          |       | iv      | 41.4 ± 2.38  |              |
|                          |                |                |    |          |       | v       | 48.9 ± 1.38  |              |
|                          |                |                |    |          |       | Average |              | 48.45 ± 9.83 |
| Group 5 = 48 - 52 months | Basopu         | M502S556E13P01 | 50 | Jul-07   | 30357 | i       | 21.84 ± 1.22 |              |
|                          |                |                |    |          |       | ii      | 27.98 ± 1.83 |              |
|                          |                |                |    |          |       | iii     | 32.64 ± 2.33 |              |
|                          |                |                |    |          |       | iv      | 33.16 ± 0.67 |              |
|                          |                |                |    |          |       | v       | 38.94 ± 3.94 |              |
|                          |                |                |    |          |       | Average |              | 30.91 ± 6.21 |
| Group 5 = 48 - 52 months | Basopu         | M502S56E13P01  | 50 | Jan-07   | 10197 | i       | 19.6 ± 3.43  |              |
|                          |                |                |    |          |       | ii      | 20.83 ± 4.92 |              |
|                          |                |                |    |          |       | iii     | 9.41 ± 1.05  |              |
|                          |                |                |    |          |       | iv      | 17.9 ± 2.62  |              |
|                          |                |                |    |          |       | v       | 15.74 ± 1.07 |              |
|                          |                |                |    |          |       | Average |              | 16.7 ± 4.92  |
| Group 5 = 48 - 52 months | Campo Yaunde   | M335S37E77P01  | 50 | Jan-07   | 10197 | i       | 7.28 ± 0.24  |              |
|                          |                |                |    |          |       | ii      | 13.26 ± 1.65 |              |
|                          |                |                |    |          |       | iii     | 7.6 ± 1.62   |              |
|                          |                |                |    |          |       | iv      | 18.92 ± 2.29 |              |
|                          |                |                |    |          |       | v       | 7.82 ± 1.27  |              |
|                          |                |                |    |          |       | Average |              | 10.98 ± 4.87 |
| Group 5 = 48 - 52 months | Campo Yaunde   | M335S37E77P01  | 50 | Ilegible | 10197 | i       | 2.28 ± 0.59  |              |
|                          |                |                |    |          |       | ii      | 3.54 ± 3.48  |              |
|                          |                |                |    |          |       | iii     | 0.36 ± 0.1   |              |
|                          |                |                |    |          |       | iv      | 0.48 ± 0     |              |
|                          |                |                |    |          |       | v       | 0.3 ± 0.18   |              |
|                          |                |                |    |          |       | Average |              | 1.59 ± 2.23  |

|                          |              |                |    |          |          |         |               |               |  |
|--------------------------|--------------|----------------|----|----------|----------|---------|---------------|---------------|--|
| Group 5 = 48 - 52 months | Campo Yaunde | M335S37E77P01  | 50 | no tiene | no tiene | i       | 3.76 ± 0.31   |               |  |
|                          |              |                |    |          |          | ii      | 1.48 ± 0.91   |               |  |
|                          |              |                |    |          |          | iii     | 5.52 ± 0.67   |               |  |
|                          |              |                |    |          |          | iv      | 5.56 ± 0.35   |               |  |
|                          |              |                |    |          |          | v       | 6.48 ± 0.7    |               |  |
|                          |              |                |    |          |          | Average |               | 4.56 ± 1.9    |  |
| Group 5 = 48 - 52 months | Campo Yaunde | M335S30E24P02  | 50 | Jan-07   | 10197    | i       | 61.93 ± 2.92  |               |  |
|                          |              |                |    |          |          | ii      | 55.76 ± 4.47  |               |  |
|                          |              |                |    |          |          | iii     | 84.57 ± 10.82 |               |  |
|                          |              |                |    |          |          | iv      | 65.43 ± 11.43 |               |  |
|                          |              |                |    |          |          | v       | 84.16 ± 7.77  |               |  |
|                          |              |                |    |          |          | Average |               | 70.37 ± 14.08 |  |
| Group 5 = 48 - 52 months | Campo Yaunde | M335S30E65P01  | 50 | Jul-07   | 30357    | i       | 51.65 ± 5.39  |               |  |
|                          |              |                |    |          |          | ii      | 38.48 ± 3.04  |               |  |
|                          |              |                |    |          |          | iii     | 66.26 ± 6.77  |               |  |
|                          |              |                |    |          |          | iv      | 39.3 ± 6.18   |               |  |
|                          |              |                |    |          |          | v       | 62.55 ± 5.6   |               |  |
|                          |              |                |    |          |          | Average |               | 51.65 ± 12.77 |  |
| Group 5 = 48 - 52 months | Central      | M276S69E103P01 | 50 | Jan-07   | 10197    | i       | 1.04 ± 0.15   |               |  |
|                          |              |                |    |          |          | ii      | 1.32 ± 0.6    |               |  |
|                          |              |                |    |          |          | iii     | 0.7 ± 0.24    |               |  |
|                          |              |                |    |          |          | iv      | 0.56 ± 0.07   |               |  |
|                          |              |                |    |          |          | v       | 0.46 ± 0.19   |               |  |
|                          |              |                |    |          |          | Average |               | 0.82 ± 0.43   |  |
| Group 5 = 48 - 52 months | Rebola       | M459S89E2P01   | 50 | Jul-07   | 30357    | i       | 60.78 ± 2.56  |               |  |
|                          |              |                |    |          |          | ii      | 65.78 ± 2.9   |               |  |
|                          |              |                |    |          |          | iii     | 82.94 ± 3.72  |               |  |
|                          |              |                |    |          |          | iv      | 72.58 ± 1.76  |               |  |
|                          |              |                |    |          |          | v       | 80.1 ± 2.18   |               |  |
|                          |              |                |    |          |          | Average |               | 72.44 ± 8.91  |  |
| Group 5 = 48 - 52 months | Santa Maria  | M333S95E42P01  | 50 | Ilegible | Ilegible | i       | 3.09 ± 1.23   |               |  |
|                          |              |                |    |          |          | ii      | 4.12 ± 1.28   |               |  |
|                          |              |                |    |          |          | iii     | 3.09 ± 0.62   |               |  |

|                          |             |                |    |        |        |         |              |               |
|--------------------------|-------------|----------------|----|--------|--------|---------|--------------|---------------|
| Group 5 = 48 - 52 months | Santa Maria | M335S92E15P01  | 50 | Região | Região | iv      | 4.32 ± 1.63  |               |
|                          |             |                |    |        |        | v       | 3.7 ± 0.62   |               |
|                          |             |                |    |        |        | Average |              | 3.66 ± 1.11   |
| Group 5 = 48 - 52 months | Santa Maria | M335S92E15P01  | 50 | Jul-07 | 30357  | i       | 22.22 ± 1.23 |               |
|                          |             |                |    |        |        | ii      | 28.19 ± 0.94 |               |
|                          |             |                |    |        |        | iii     | 41.56 ± 3.97 |               |
|                          |             |                |    |        |        | iv      | 12.96 ± 3.49 |               |
|                          |             |                |    |        |        | v       | 20.99 ± 0.62 |               |
|                          |             |                |    |        |        | Average |              | 23.75 ± 10.33 |
| Group 5 = 48 - 52 months | Central     | M276S89E114P01 | 51 | Jan-07 | 10197  | i       | 38.68 ± 0.94 |               |
|                          |             |                |    |        |        | ii      | 31.48 ± 1.23 |               |
|                          |             |                |    |        |        | iii     | 38.27 ± 6.96 |               |
|                          |             |                |    |        |        | iv      | 41.98 ± 6.96 |               |
|                          |             |                |    |        |        | v       | 50.82 ± 3.17 |               |
|                          |             |                |    |        |        | Average |              | 40.25 ± 7.62  |
| Group 5 = 48 - 52 months | Central     | M276S68E34P01  | 51 | Dec-07 | 15297  | i       | 26.54 ± 1.63 |               |
|                          |             |                |    |        |        | ii      | 27.57 ± 4.95 |               |
|                          |             |                |    |        |        | iii     | 37.65 ± 1.07 |               |
|                          |             |                |    |        |        | iv      | 24.9 ± 5.74  |               |
|                          |             |                |    |        |        | v       | 51.85 ± 5.49 |               |
|                          |             |                |    |        |        | Average |              | 33.7 ± 11.07  |
| Group 5 = 48 - 52 months | Ela Nguema  | M278S8E61P01   | 51 | Jul-07 | 30357  | i       | 0            |               |
|                          |             |                |    |        |        | ii      | 21.4 ± 2.49  |               |
|                          |             |                |    |        |        | iii     | 41.98 ± 4.32 |               |
|                          |             |                |    |        |        | iv      | 25.1 ± 3.97  |               |
|                          |             |                |    |        |        | v       | 36.21 ± 4.71 |               |
|                          |             |                |    |        |        | Average |              | 22.43 ± 18.52 |

| According to the age of the LLINs                                  |                         |           |
|--------------------------------------------------------------------|-------------------------|-----------|
| Test Kit category                                                  | Mortality rate (%)      |           |
| Status & DM range (mg/m <sup>2</sup> )                             | Each section            | Whole net |
| Pass (>25)<br>Pass (>25)<br>Pass (>25)<br>Pass (>25)<br>Pass (>25) |                         |           |
| Pass (>25)<br>Pass (>25)<br>Pass (>25)<br>Pass (>25)<br>Pass (>25) |                         |           |
| Pass (>25)<br>Pass (>25)<br>Pass (>25)<br>Pass (>25)<br>Pass (>25) |                         |           |
| Pass (>25)<br>Pass (>25)<br>Pass (>25)<br>Pass (>25)<br>Pass (>25) |                         |           |
| Pass (>25)<br>Pass (>25)<br>Pass (>25)<br>Pass (>25)<br>Pass (>25) |                         |           |
| Pass (>25)<br>Pass (>25)<br>Pass (>25)<br>Pass (>25)<br>Pass (>25) | 100<br>100<br>100<br>90 |           |
|                                                                    |                         | 97.5      |
| Fail (5-15)<br>Fail (5-15)<br>Pass (>25)                           | 60<br>90                |           |

|              |     |      |
|--------------|-----|------|
| Fail (5-15)  | 70  |      |
| Pass (15-25) | 80  |      |
|              |     | 75   |
| Pass (>25)   |     |      |
| Pass (>25)   |     |      |
| Pass (>25)   |     |      |
| Pass (>25)   |     |      |
| Pass (>25)   |     |      |
|              |     |      |
| Pass (>25)   |     |      |
| Pass (15-25) | 100 |      |
| Pass (>25)   | 100 |      |
| Pass (15-25) | 90  |      |
| Pass (>25)   | 90  |      |
|              |     | 95   |
| Pass (>25)   |     |      |
| Fail (5-15)  |     |      |
| Pass (>25)   |     |      |
| Pass (>25)   |     |      |
|              |     |      |
| Pass (>25)   |     |      |
| Pass (>25)   | 100 |      |
| Pass (>25)   | 90  |      |
| Pass (>25)   | 90  |      |
| Pass (>25)   | 90  |      |
|              |     | 92.5 |
| Pass (>25)   |     |      |
| Pass (>25)   | 100 |      |
| Pass (>25)   | 100 |      |
| Pass (>25)   | 100 |      |
| Pass (>25)   | 100 |      |
|              |     | 100  |

|              |     |      |
|--------------|-----|------|
| Pass (>25)   |     |      |
| Pass (>25)   |     |      |
| Pass (>25)   |     |      |
| Pass (>25)   |     |      |
| Pass (>25)   |     |      |
|              |     |      |
| Pass (>25)   |     |      |
| Pass (>25)   | 100 |      |
| Pass (>25)   | 100 |      |
| Pass (>25)   | 90  |      |
| Pass (>25)   | 90  |      |
|              |     | 95   |
| Pass (>25)   |     |      |
| Pass (>25)   |     |      |
| Pass (>25)   |     |      |
| Pass (>25)   |     |      |
| Pass (>25)   |     |      |
|              |     |      |
| Pass (>25)   |     |      |
| Pass (>25)   | 100 |      |
| Pass (>25)   | 100 |      |
| Pass (>25)   | 90  |      |
| Pass (>25)   | 100 |      |
|              |     | 97.5 |
| Pass (>25)   |     |      |
| Pass (15-25) | 100 |      |
| Pass (>25)   | 100 |      |
| Pass (>25)   | 100 |      |
| Pass (>25)   | 100 |      |
|              |     | 100  |
| Fail (0-5)   |     |      |
| Pass (15-25) |     |      |
| Pass (>25)   |     |      |

|              |     |     |
|--------------|-----|-----|
| Pass (>25)   |     |     |
| Pass (>25)   |     |     |
|              |     |     |
| Pass (>25)   |     |     |
| Pass (>25)   |     |     |
| Pass (>25)   |     |     |
| Pass (>25)   |     |     |
| Pass (>25)   |     |     |
|              |     |     |
| Pass (>25)   |     |     |
| Pass (>25)   |     |     |
| Pass (>25)   |     |     |
| Pass (>25)   |     |     |
| Pass (>25)   |     |     |
|              |     |     |
| Pass (>25)   |     |     |
| Pass (>25)   | 100 |     |
| Pass (>25)   | 100 |     |
| Pass (>25)   | 100 |     |
| Pass (>25)   | 100 |     |
|              |     | 100 |
| Pass (15-25) |     |     |
| Fail (5-15)  | 100 |     |
| Fail (5-15)  | 100 |     |
| Pass (>25)   | 100 |     |
| Pass (>25)   | 100 |     |
|              |     | 100 |

|              |     |      |
|--------------|-----|------|
| Fail (5-15)  |     |      |
| Pass (15-25) | 100 |      |
| Pass (>25)   | 100 |      |
| Pass (>25)   | 90  |      |
| Pass (>25)   | 100 |      |
|              |     | 97.5 |
| Pass (>25)   |     |      |
| Pass (>25)   |     |      |
| Pass (>25)   |     |      |
| Pass (>25)   |     |      |
| Pass (>25)   |     |      |
|              |     |      |
| Pass (>25)   |     |      |
| Pass (15-25) | 100 |      |
| Pass (>25)   | 100 |      |
| Pass (>25)   | 100 |      |
| Pass (>25)   | 100 |      |
|              |     | 100  |
| Pass (>25)   |     |      |
| Pass (>25)   | 100 |      |
| Pass (>25)   | 100 |      |
| Pass (>25)   | 100 |      |
| Pass (>25)   | 100 |      |
|              |     | 100  |
| Pass (>25)   |     |      |
| Pass (>25)   | 100 |      |
| Pass (>25)   | 100 |      |
| Pass (>25)   | 100 |      |
| Pass (>25)   | 100 |      |
|              |     | 100  |
| Pass (>25)   |     |      |
| Pass (>25)   |     |      |
| Pass (>25)   |     |      |

|              |     |      |
|--------------|-----|------|
| Pass (>25)   |     |      |
| Pass (>25)   |     |      |
| Pass (15-25) |     |      |
| Pass (>25)   |     |      |
| Pass (>25)   |     |      |
| Pass (>25)   |     |      |
| Pass (>25)   |     |      |
| Pass (>25)   |     |      |
| Pass (>25)   | 100 |      |
| Pass (>25)   | 100 |      |
| Pass (>25)   | 90  |      |
| Pass (>25)   | 80  |      |
|              |     | 92.5 |
| Pass (>25)   |     |      |
| Pass (>25)   | 100 |      |
| Pass (>25)   | 80  |      |
| Pass (>25)   | 90  |      |
| Pass (>25)   | 100 |      |
|              |     | 92.5 |
| Pass (>25)   |     |      |
| Pass (>25)   |     |      |
| Pass (>25)   |     |      |
| Pass (>25)   |     |      |
| Pass (>25)   |     |      |
| Fail (0)     |     |      |
| Fail (5-15)  | 70  |      |
| Pass (>25)   | 50  |      |
| Pass (15-25) | 80  |      |
| Pass (>25)   | 50  |      |
|              |     | 62.5 |

|              |     |      |
|--------------|-----|------|
| Fail (0)     |     |      |
| Fail (0)     | 70  |      |
| Pass (>25)   | 100 |      |
| Fail (5-15)  | 60  |      |
| Fail (5-15)  | 80  |      |
|              |     | 77.5 |
| Fail (0)     |     |      |
| Pass (>25)   |     |      |
| Pass (>25)   |     |      |
| Pass (>25)   |     |      |
| Pass (>25)   |     |      |
|              |     |      |
| Pass (>25)   |     |      |
| Pass (>25)   | 100 |      |
| Pass (>25)   | 90  |      |
| Pass (>25)   | 100 |      |
| Pass (>25)   | 90  |      |
|              |     | 95   |
| Pass (15-25) |     |      |
| Pass (>25)   |     |      |
| Pass (>25)   |     |      |
| Pass (>25)   |     |      |
| Pass (>25)   |     |      |
|              |     |      |
| Fail (5-15)  |     |      |
| Fail (0)     | 70  |      |
| Pass (>25)   | 60  |      |
| Fail (0)     | 100 |      |
| Pass (15-25) | 70  |      |
|              |     | 75   |
| Pass (>25)   |     |      |
| Pass (>25)   | 100 |      |
| Pass (>25)   | 100 |      |



|              |     |    |
|--------------|-----|----|
| Pass (>25)   |     |    |
| Pass (>25)   |     |    |
| Pass (>25)   |     |    |
| Pass (>25)   |     |    |
| Pass (>25)   |     |    |
|              |     |    |
| Pass (>25)   |     |    |
| Pass (>25)   | 80  |    |
| Pass (>25)   | 80  |    |
| Pass (>25)   | 100 |    |
| Pass (>25)   | 100 |    |
|              |     | 90 |
| Fail (5-15)  |     |    |
| Pass (15-25) |     |    |
| Pass (15-25) |     |    |
| Fail (5-15)  |     |    |
| Pass (15-25) |     |    |
|              |     |    |
| Pass (>25)   |     |    |
| Pass (>25)   |     |    |
| Pass (>25)   |     |    |
| Pass (>25)   |     |    |
| Pass (>25)   |     |    |
|              |     |    |
| Pass (>25)   |     |    |
| Pass (>25)   |     |    |
| Pass (>25)   |     |    |



|              |     |      |
|--------------|-----|------|
| Pass (>25)   |     |      |
| Fail (5-15)  |     |      |
| Pass (>25)   |     |      |
| Pass (>25)   |     |      |
| Pass (>25)   |     |      |
|              |     |      |
| Pass (15-25) |     |      |
| Pass (>25)   |     |      |
| Pass (>25)   |     |      |
| Pass (>25)   |     |      |
| Pass (>25)   |     |      |
|              |     |      |
| Pass (>25)   |     |      |
| Pass (>25)   | 80  |      |
| Pass (>25)   | 100 |      |
| Pass (>25)   | 90  |      |
| Pass (>25)   | 90  |      |
|              |     | 90   |
| Pass (>25)   |     |      |
| Pass (>25)   | 90  |      |
| Pass (>25)   | 90  |      |
| Pass (>25)   | 90  |      |
| Pass (>25)   | 80  |      |
|              |     | 87.5 |
| Fail (5-15)  |     |      |
| Pass (15-25) |     |      |
| Pass (>25)   |     |      |
| Pass (>25)   |     |      |
| Pass (>25)   |     |      |
|              |     |      |
| Pass (>25)   |     |      |
| Pass (>25)   |     |      |
| Fail (5-15)  |     |      |

|              |  |  |
|--------------|--|--|
| Pass (>25)   |  |  |
| Pass (>25)   |  |  |
|              |  |  |
| Pass (>25)   |  |  |
| Pass (>25)   |  |  |
| Pass (>25)   |  |  |
| Pass (>25)   |  |  |
| Pass (>25)   |  |  |
|              |  |  |
| Pass (>25)   |  |  |
| Pass (>25)   |  |  |
| Pass (>25)   |  |  |
| Pass (>25)   |  |  |
| Pass (>25)   |  |  |
|              |  |  |
| Fail (0)     |  |  |
| Fail (0)     |  |  |
| Pass (15-25) |  |  |
| Pass (>25)   |  |  |
| Pass (>25)   |  |  |
|              |  |  |
| Fail (5-15)  |  |  |
| Fail (0)     |  |  |
| Pass (15-25) |  |  |
| Fail (5-15)  |  |  |
| Pass (15-25) |  |  |
|              |  |  |
| Pass (15-25) |  |  |
| Fail (0)     |  |  |
| Pass (15-25) |  |  |
| Pass (15-25) |  |  |
| Pass (>25)   |  |  |
|              |  |  |

|              |     |    |
|--------------|-----|----|
| Pass (15-25) |     |    |
| Pass (>25)   |     |    |
| Pass (>25)   |     |    |
| Pass (>25)   |     |    |
| Pass (>25)   |     |    |
|              |     |    |
| Pass (15-25) |     |    |
| Pass (15-25) | 90  |    |
| Pass (15-25) | 100 |    |
| Pass (>25)   | 90  |    |
| Pass (>25)   | 80  |    |
|              |     | 90 |
| Fail (0)     |     |    |
| Fail (0)     |     |    |
| Fail (0)     |     |    |
| Fail (0)     |     |    |
| Fail (0)     |     |    |
|              |     |    |
| Pass (15-25) |     |    |
| Pass (15-25) |     |    |
| Pass (15-25) |     |    |
| Pass (15-25) |     |    |
| Fail (5-15)  |     |    |
|              |     |    |
| Pass (15-25) |     |    |
| Pass (15-25) | 80  |    |
| Pass (>25)   | 80  |    |
| Pass (>25)   | 90  |    |
| Pass (>25)   | 90  |    |
|              |     | 85 |
| Fail (0)     |     |    |
| Fail (0)     | 60  |    |
| Pass (15-25) | 80  |    |



|              |     |      |
|--------------|-----|------|
| Pass (>25)   |     |      |
| Pass (>25)   |     |      |
| Pass (>25)   |     |      |
| Pass (>25)   |     |      |
| Pass (>25)   |     |      |
|              |     |      |
| Pass (>25)   |     |      |
| Pass (>25)   |     |      |
| Pass (>25)   |     |      |
| Pass (>25)   |     |      |
| Pass (>25)   |     |      |
|              |     |      |
| Fail (5-15)  |     |      |
| Pass (>25)   | 80  |      |
| Pass (>25)   | 100 |      |
| Pass (>25)   | 90  |      |
| Pass (>25)   | 100 |      |
|              |     | 92.5 |
| Pass (>25)   |     |      |
| Pass (>25)   | 90  |      |
| Pass (15-25) | 70  |      |
| Pass (>25)   | 80  |      |
| Pass (>25)   | 100 |      |
|              |     | 85   |
| Pass (>25)   |     |      |
| Pass (>25)   | 90  |      |
| Pass (>25)   | 100 |      |
| Pass (>25)   | 100 |      |
| Pass (>25)   | 100 |      |
|              |     | 97.5 |
| Fail (0)     |     |      |
| Fail (0)     |     |      |
| Pass (>25)   |     |      |



|              |     |      |
|--------------|-----|------|
| Pass (>25)   |     |      |
| Pass (>25)   | 90  |      |
| Pass (>25)   | 90  |      |
| Pass (>25)   | 100 |      |
| Pass (>25)   | 100 |      |
|              |     | 95   |
| Pass (>25)   |     |      |
| Pass (>25)   |     |      |
| Pass (>25)   |     |      |
| Pass (>25)   |     |      |
| Pass (>25)   |     |      |
|              |     |      |
| Fail (0)     |     |      |
| Fail (0)     |     |      |
| Fail (0)     |     |      |
| Fail (0)     |     |      |
| Fail (0)     |     |      |
|              |     |      |
| Fail (0-5)   |     |      |
| Fail (0-5)   | 40  |      |
| Pass (>25)   | 40  |      |
| Fail (5-15)  | 20  |      |
| Pass (15-25) | 20  |      |
|              |     | 30   |
| Fail (0)     |     |      |
| Fail (5-15)  | 50  |      |
| Fail (5-15)  | 70  |      |
| Fail (5-15)  | 40  |      |
| Fail (5-15)  | 70  |      |
|              |     | 57.5 |
| Fail (5-15)  |     |      |
| Fail (5-15)  | 60  |      |
| Pass (>25)   | 70  |      |

|              |    |      |
|--------------|----|------|
| Fail (5-15)  | 60 |      |
| Pass (15-25) | 80 |      |
|              |    | 67.5 |
| Fail (0)     |    |      |
| Fail (0)     |    |      |
| Fail (0)     |    |      |
| Fail (0)     |    |      |
| Fail (0)     |    |      |
|              |    |      |
| Pass (>25)   |    |      |
| Pass (>25)   |    |      |
| Pass (>25)   |    |      |
| Pass (>25)   |    |      |
| Pass (>25)   |    |      |
|              |    |      |
| Pass (>25)   |    |      |
| Pass (>25)   |    |      |
| Pass (>25)   |    |      |
| Pass (>25)   |    |      |
| Pass (>25)   |    |      |
|              |    |      |
| Pass (>25)   |    |      |
| Pass (>25)   |    |      |
| Pass (>25)   |    |      |
| Pass (>25)   |    |      |
| Pass (>25)   |    |      |
|              |    |      |
| Fail (0)     |    |      |
| Fail (0)     |    |      |
| Fail (0-5)   |    |      |
| Fail (0)     |    |      |
| Fail (5-15)  |    |      |
|              |    |      |

|              |    |  |
|--------------|----|--|
| Pass (>25)   |    |  |
| Pass (>25)   |    |  |
| Pass (>25)   |    |  |
| Pass (>25)   |    |  |
| Pass (>25)   |    |  |
|              |    |  |
| Pass (>25)   |    |  |
| Pass (>25)   |    |  |
| Pass (>25)   |    |  |
| Pass (>25)   |    |  |
| Pass (>25)   |    |  |
|              |    |  |
| Pass (>25)   |    |  |
| Pass (>25)   |    |  |
| Pass (>25)   |    |  |
| Pass (>25)   |    |  |
| Pass (>25)   |    |  |
|              |    |  |
| Pass (>25)   |    |  |
| Pass (15-25) |    |  |
| Pass (>25)   |    |  |
| Pass (>25)   |    |  |
| Pass (>25)   |    |  |
|              |    |  |
| Fail (0-5)   |    |  |
| Fail (5-15)  | 60 |  |
| Fail (5-15)  | 50 |  |

|              |     |      |
|--------------|-----|------|
| Fail (5-15)  | 40  |      |
| Pass (>25)   | 60  |      |
|              |     | 52.5 |
| Fail (0-5)   |     |      |
| Fail (0-5)   |     |      |
| Fail (0-5)   |     |      |
| Fail (0-5)   |     |      |
| Fail (5-15)  |     |      |
|              |     |      |
| Pass (>25)   |     |      |
| Pass (>25)   |     |      |
| Pass (>25)   |     |      |
| Pass (>25)   |     |      |
| Pass (>25)   |     |      |
|              |     |      |
| Pass (>25)   |     |      |
| Pass (>25)   |     |      |
| Pass (>25)   |     |      |
| Pass (>25)   |     |      |
| Pass (>25)   |     |      |
|              |     |      |
| Pass (>25)   |     |      |
| Pass (>25)   | 100 |      |
| Pass (>25)   | 90  |      |
| Pass (>25)   | 100 |      |
| Pass (>25)   | 100 |      |
|              |     | 97.5 |
| Pass (>25)   |     |      |
| Pass (>25)   |     |      |
| Pass (>25)   |     |      |
| Pass (15-25) |     |      |
| Pass (>25)   |     |      |
|              |     |      |

|              |     |      |
|--------------|-----|------|
| Fail (0-5)   |     |      |
| Fail (0-5)   |     |      |
| Pass (>25)   |     |      |
| Fail (5-15)  |     |      |
| Pass (>25)   |     |      |
|              |     |      |
| Pass (>25)   |     |      |
| Fail (0-5)   |     |      |
| Pass (>25)   |     |      |
| Pass (>25)   |     |      |
| Pass (>25)   |     |      |
|              |     |      |
| Pass (15-25) |     |      |
| Pass (15-25) | 90  |      |
| Pass (>25)   | 100 |      |
| Pass (>25)   | 100 |      |
| Pass (>25)   | 100 |      |
|              |     | 97.5 |
| Fail (0-5)   |     |      |
| Fail (0-5)   |     |      |
| Pass (>25)   |     |      |
| Fail (5-15)  |     |      |
| Pass (>25)   |     |      |
|              |     |      |
| Pass (>25)   |     |      |
| Pass (>25)   |     |      |
| Pass (>25)   |     |      |
| Pass (>25)   |     |      |
| Pass (>25)   |     |      |
|              |     |      |
| Fail (5-15)  |     |      |
| Fail (0)     |     |      |
| Pass (15-25) |     |      |

|              |     |      |
|--------------|-----|------|
| Fail (5-15)  |     |      |
| Pass (15-25) |     |      |
| Pass (>25)   |     |      |
| Pass (>25)   | 100 |      |
| Pass (>25)   | 80  |      |
| Pass (>25)   | 90  |      |
| Pass (>25)   | 100 |      |
|              |     | 92.5 |
| Pass (15-25) |     |      |
| Pass (>25)   | 70  |      |
| Pass (>25)   | 100 |      |
| Pass (>25)   | 90  |      |
| Pass (>25)   | 100 |      |
|              |     | 90   |
| Pass (15-25) |     |      |
| Pass (15-25) |     |      |
| Fail (5-15)  |     |      |
| Pass (15-25) |     |      |
| Pass (15-25) |     |      |
| Fail (5-15)  |     |      |
| Fail (5-15)  | 20  |      |
| Fail (5-15)  | 70  |      |
| Pass (15-25) | 10  |      |
| Fail (5-15)  | 30  |      |
|              |     | 32.5 |
| Fail (0-5)   |     |      |
| Fail (0-5)   |     |      |
| Fail (0-5)   |     |      |
| Fail (0-5)   |     |      |
| Fail (0-5)   |     |      |

|             |     |      |
|-------------|-----|------|
| Fail (0-5)  |     |      |
| Fail (0-5)  |     |      |
| Fail (5-15) |     |      |
| Fail (5-15) |     |      |
| Fail (5-15) |     |      |
|             |     |      |
| Pass (>25)  |     |      |
| Pass (>25)  |     |      |
| Pass (>25)  |     |      |
| Pass (>25)  |     |      |
| Pass (>25)  |     |      |
|             |     |      |
| Pass (>25)  |     |      |
| Pass (>25)  | 100 |      |
| Pass (>25)  | 90  |      |
| Pass (>25)  | 100 |      |
| Pass (>25)  | 100 |      |
|             |     | 97.5 |
| Fail (0-5)  |     |      |
| Fail (0-5)  |     |      |
| Fail (0-5)  |     |      |
| Fail (0-5)  |     |      |
| Fail (0-5)  |     |      |
|             |     |      |
| Pass (>25)  |     |      |
| Pass (>25)  | 90  |      |
| Pass (>25)  | 100 |      |
| Pass (>25)  | 100 |      |
| Pass (>25)  | 100 |      |
|             |     | 97.5 |
| Fail (0-5)  |     |      |
| Fail (0-5)  |     |      |
| Fail (0-5)  |     |      |

|              |     |      |
|--------------|-----|------|
| Fail (0-5)   |     |      |
| Fail (0-5)   |     |      |
| Pass (15-25) |     |      |
| Pass (>25)   |     |      |
| Pass (>25)   |     |      |
| Fail (5-15)  |     |      |
| Pass (15-25) |     |      |
|              |     |      |
| Pass (>25)   |     |      |
| Pass (>25)   |     |      |
| Pass (>25)   |     |      |
| Pass (>25)   |     |      |
| Pass (>25)   |     |      |
|              |     |      |
| Pass (>25)   |     |      |
| Pass (>25)   |     |      |
| Pass (>25)   |     |      |
| Pass (15-25) |     |      |
| Pass (>25)   |     |      |
|              |     |      |
| Fail (0)     |     |      |
| Pass (15-25) | 80  |      |
| Pass (>25)   | 80  |      |
| Pass (>25)   | 50  |      |
| Pass (>25)   | 100 |      |
|              |     | 77.5 |
